# Supplementary material for: A Systematic Review and Meta-Analysis of Associations between Green and Blue Spaces and Birth Outcomes
Source: MDPI journal article supplement (doi:10.3390/ijerph17082949), 2020-04-24
Supplement: s1 [file s1]

## Supplementary Materials

### A systematic review and meta-analysis of associations between green and blue spaces and birth outcomes

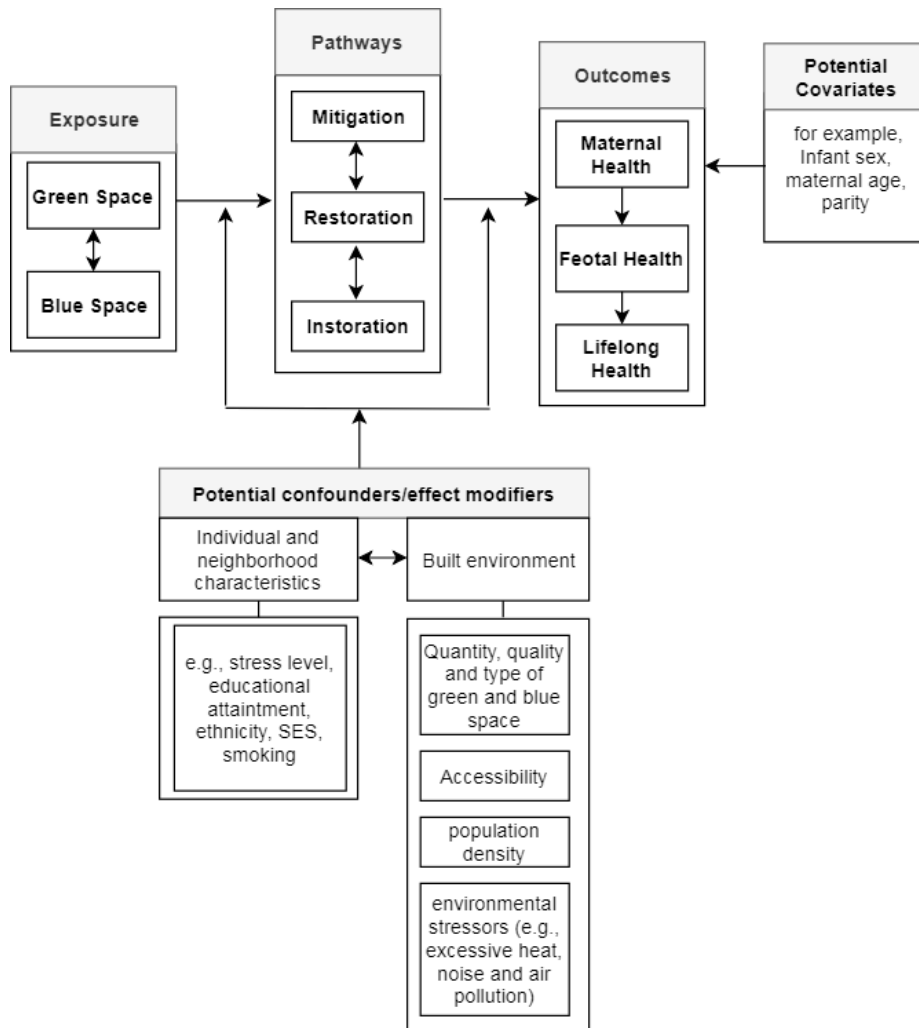

Figure S1. Assumption on Potential Pathways between Green and Blue Space and Pregnancy Outcome

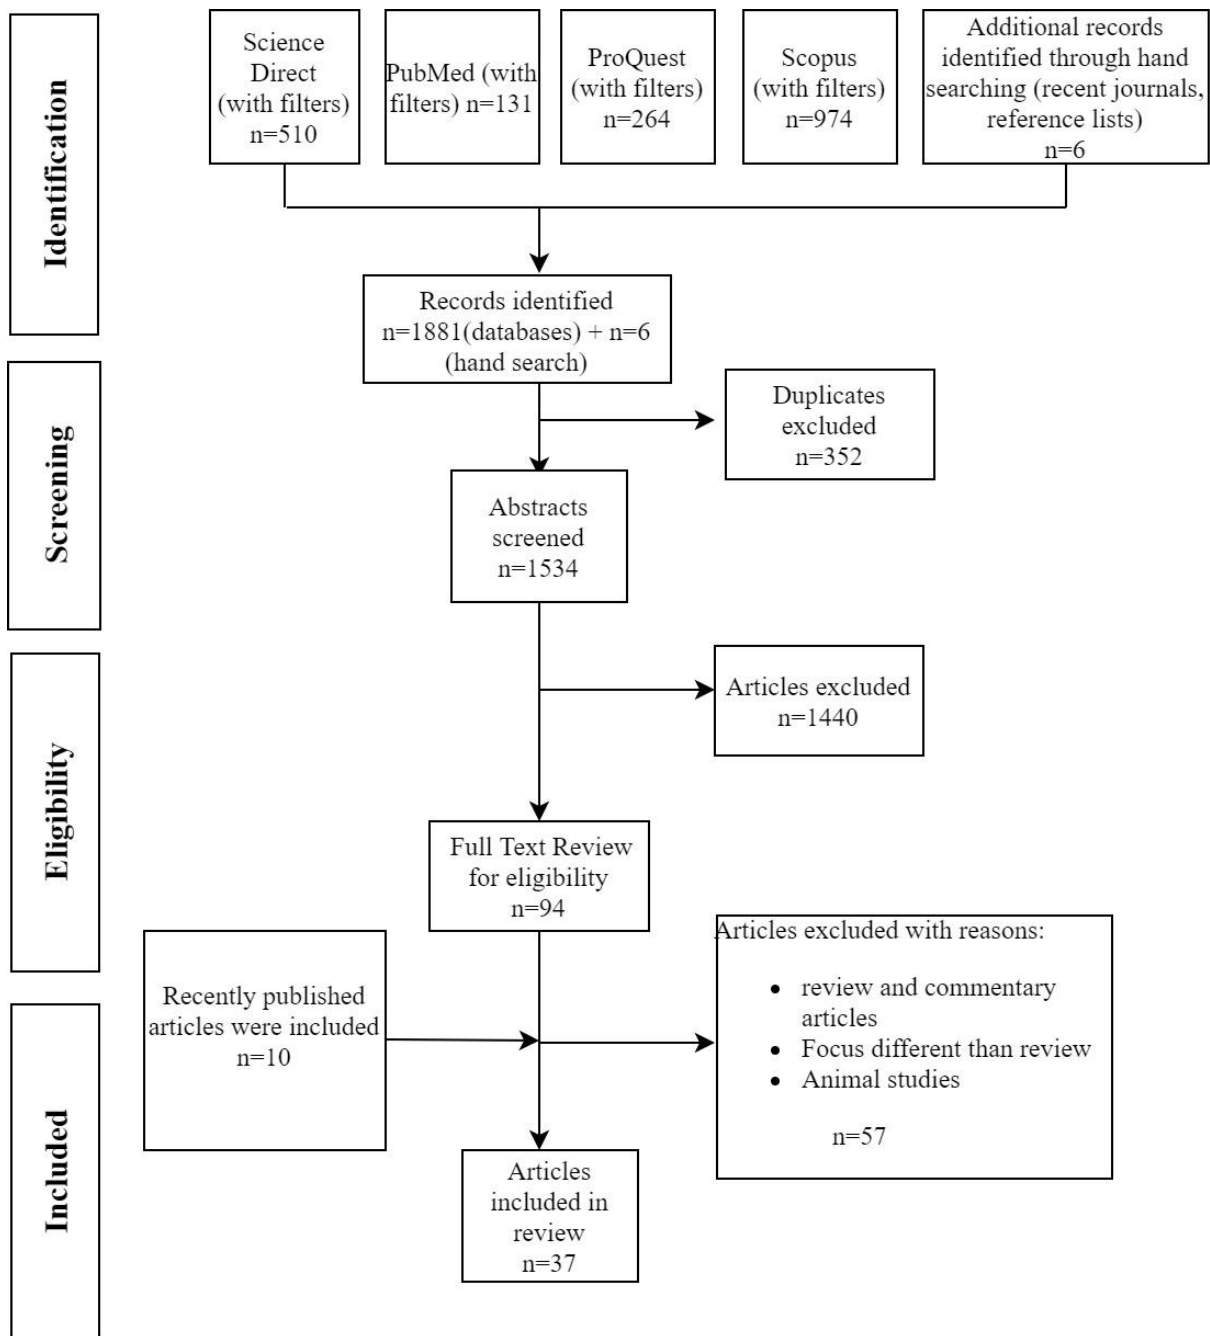

Figure S2. Selection process of included articles

| Database       | Search Terms                                                                                                                                                                                                                                                                                                                                                                                                                                                                                                                                                                                        | Results found | Date last searched |
|----------------|-----------------------------------------------------------------------------------------------------------------------------------------------------------------------------------------------------------------------------------------------------------------------------------------------------------------------------------------------------------------------------------------------------------------------------------------------------------------------------------------------------------------------------------------------------------------------------------------------------|---------------|--------------------|
| Science Direct | Title, abstract or author-specified keywords:<br>"urban green space" OR "green space" OR trees<br>OR "natural environment" OR vegetation OR "blue<br>space" OR "aquatic place" OR coast AND "birth<br>outcomes" OR "perinatal health outcomes" OR<br>"pregnancy outcomes"                                                                                                                                                                                                                                                                                                                           | 510           | 13/12/2018         |
| PubMed         | Search (((((((("green space") OR "urban green<br>space"[Title/Abstract]) OR "natural<br>environment"[Title/Abstract]) OR<br>"vegetation"[Title/Abstract]) OR<br>"park"[Title/Abstract]) OR "trees"[Title/Abstract])<br>AND "pregnancy outcomes"[Title/Abstract]) OR<br>"birth outcomes"[Title/Abstract]) OR "perinatal<br>health outcomes"[Title/Abstract]) OR "perinatal<br>health"[Title/Abstract] AND Journal Article[ptyp]<br>OR "blue space"[Title/Abstract]) OR "aquatic<br>place"[Title/Abstract]) OR coast[Title/Abstract])<br>AND free full text[sb] AND Humans[Mesh] AND<br>English[lang] | 131           | 13/12/2018         |
| ProQuest       | ab("green space") OR ab("urban green space") OR<br>ab("blue space") OR ab("aquatic place") OR<br>ab("coast") AND ab("pregnancy outcomes") OR<br>ab("birth outcomes") OR ab("perinatal health") OR<br>ab("perinatal health outcomes")Limits applied<br>Databases: ProQuest Central Limited by: Full text,<br>Peer reviewed, Narrowed by: Full text: Full<br>text; Document type: Article; Language: English;<br>Peer reviewed: Peer reviewed                                                                                                                                                         | 264           | 13/12/2018         |
| Scopus         | TITLE-ABS-KEY ( "urban green<br>space" ) OR TITLE-ABS ( "green<br>space" ) OR TITLE-ABS-<br>KEY ( vegetation ) OR TITLE-ABS-<br>KEY ( trees ) OR TITLE-ABS-KEY ( "blue<br>space" ) OR TITLE-ABS-KEY ( "aquatic<br>place" ) AND TITLE-ABS-KEY ( "pregnancy<br>outcomes" ) OR TITLE-ABS-KEY ( "perinatal<br>health outcomes" ) OR TITLE-ABS-KEY ( "birth<br>outcomes" ) AND ( LIMIT-<br>TO ( LANGUAGE , "English" ) ) AND ( LIMIT-<br>TO ( DOCTYPE , "ar" ) )                                                                                                                                         | 974           | 13/12/2018         |

Table S1. Digital Search Strategy

|                              | 1 | 2 | 3 | 4 | 5 | 6 | 7 | 8 | 9 | 10 | 11 | 12 | 13 | 14 | TOTAL POSITIVE | TOTAL APPLICABLE | PERCENTAGE | RANKING  |
|------------------------------|---|---|---|---|---|---|---|---|---|----|----|----|----|----|----------------|------------------|------------|----------|
| 2019, Asta et al.            | Y | Y | Y | Y | Y | N | N | Y | Y | NA | Y  | NR | NA | Y  | 9              | 12               | 0.75       | HIGH     |
| 2019, Choe et al             | Y | Y | Y | Y | Y | N | N | Y | Y | NA | Y  | NR | NA | Y  | 9              | 12               | 0.75       | HIGH     |
| 2019, Donovan et al.         | Y | Y | Y | Y | N | N | N | Y | Y | NA | Y  | NR | NA | Y  | 8              | 12               | 0.66       | MODERATE |
| 2019, Dzhambov et al.        | Y | Y | Y | Y | N | N | N | Y | Y | NA | Y  | NR | NA | Y  | 8              | 12               | 0.66       | MODERATE |
| 2019, Eriksson et al.        | Y | Y | Y | Y | N | N | N | Y | Y | NA | Y  | NR | NA | Y  | 8              | 12               | 0.66       | MODERATE |
| 2019, Laurent et al.         | Y | Y | Y | Y | Y | Y | N | Y | Y | Y  | Y  | NR | NA | Y  | 11             | 13               | 0.84       | HIGH     |
| 2019, Liao et al.            | Y | Y | Y | Y | N | N | N | Y | Y | NA | Y  | NR | NA | Y  | 8              | 12               | 0.66       | MODERATE |
| 2019, Nieuwenhuijse n et al. | Y | Y | Y | Y | Y | N | N | Y | Y | NA | Y  | NR | NA | Y  | 9              | 12               | 0.75       | HIGH     |
| 2019, Schinasi et al.        | Y | Y | Y | Y | Y | N | N | Y | Y | NA | Y  | NR | NA | Y  | 9              | 12               | 0.75       | HIGH     |
| 2019, Seabrook et al.        | Y | Y | Y | Y | Y | N | N | Y | Y | NA | Y  | NR | NA | Y  | 9              | 12               | 0.75       | HIGH     |

|                                   |   |   |    |   |   |   |   |   |   |    |   |    |    |   |    |    |      |          |
|-----------------------------------|---|---|----|---|---|---|---|---|---|----|---|----|----|---|----|----|------|----------|
| 2019, Sun et al.                  | Y | Y | Y  | Y | Y | N | N | Y | Y | NA | Y | NR | NA | Y | 9  | 12 | 0.75 | HIGH     |
| 2019, Yin.                        | Y | Y | Y  | Y | N | N | N | Y | Y | N  | Y | NR | NA | Y | 8  | 12 | 0.66 | MODERATE |
| 2018, Agay-Shay et al.            | Y | Y | Y  | Y | Y | Y | N | Y | Y | Y  | Y | NR | NA | Y | 11 | 13 | 0.92 | HIGH     |
| 2018, Cusack et al.               | Y | Y | Y  | Y | Y | Y | Y | Y | Y | Y  | Y | CD | NR | Y | 12 | 14 | 0.86 | HIGH     |
| 2018, Fong et al.                 | Y | Y | Y  | Y | Y | N | N | Y | Y | NA | Y | NR | NA | Y | 9  | 12 | 0.75 | HIGH     |
| 2018, Glazer et al.               | Y | Y | Y  | Y | Y | N | N | Y | Y | NA | Y | NR | NA | Y | 9  | 12 | 0.75 | HIGH     |
| 2017, Richardson Et al.           | Y | Y | CD | Y | Y | N | N | Y | Y | NA | Y | NR | NA | Y | 8  | 12 | 0.66 | MODERATE |
| 2017a, Nichani et al.             | Y | Y | Y  | Y | Y | Y | N | Y | Y | NA | Y | CD | Y  | Y | 11 | 13 | 0.84 | HIGH     |
| 2017b, Nichani Et al.             | Y | Y | Y  | Y | Y | Y | N | Y | Y | NA | Y | CD | Y  | Y | 11 | 13 | 0.84 | HIGH     |
| 2017, Cusack Et al.               | Y | Y | Y  | Y | Y | N | N | Y | Y | NA | Y | NR | NA | Y | 9  | 12 | 0.75 | HIGH     |
| 2017, Abelt, K., & McLafferty, S. | Y | Y | CD | Y | Y | N | N | Y | Y | NA | Y | NR | NA | Y | 8  | 12 | 0.66 | MODERATE |

|                                         |   |   |    |   |    |      |      |   |   |    |   |    |    |   |    |    |      |          |
|-----------------------------------------|---|---|----|---|----|------|------|---|---|----|---|----|----|---|----|----|------|----------|
| 2016, Young Et al.                      | Y | Y | Y  | Y | Y  | N    | N    | N | Y | NA | Y | NR | NA | Y | 8  | 12 | 0.66 | MODERATE |
| 2016, Ebisu Et al.                      | Y | Y | CD | Y | Y  | N    | N    | Y | Y | NA | Y | NR | NA | Y | 8  | 12 | 0.66 | MODERATE |
| 2016, Cusack Et                         | Y | Y | Y  | Y | Y  | Y    | N    | Y | Y | Y  | Y | NR | NA | Y | 11 | 13 | 0.92 | HIGH     |
| 2016, Casey Et al.                      | Y | Y | Y  | Y | Y  | CD   | N    | Y | Y | Y  | Y | NR | NA | Y | 10 | 13 | 0.77 | HIGH     |
| 2015, McEachan Et al.                   | Y | Y | Y  | Y | Y  | N    | N    | Y | Y | NA | Y | NR | NA | Y | 9  | 12 | 0.75 | HIGH     |
| 2015, Grazuleviciene Et al.             | Y | Y | Y  | Y | N  | CD   | CD   | Y | Y | N  | Y | Y  | NR | Y | 9  | 14 | 0.64 | MODERATE |
| 2014, Hystad Et al.                     | Y | Y | Y  | Y | Y  | Y    | Y-CD | Y | Y | Y  | Y | NR | Y  | Y | 12 | 14 | 0.86 | HIGH     |
| 2014, Dadvan Et Al. (residential prox.) | Y | Y | CD | Y | CD | N-CD | CD   | Y | Y | CD | Y | Y  | Y  | Y | 9  | 14 | 0.64 | MODERATE |
| 2014, Agay-Shay Et al.                  | Y | Y | Y  | Y | Y  | N    | N    | Y | Y | NR | Y | NR | NA | Y | 9  | 12 | 0.75 | HIGH     |
| 2014, Dadvand Et al.                    | Y | Y | Y  | Y | Y  | N    | N    | Y | Y | NA | Y | NR | NA | Y | 9  | 12 | 0.75 | HIGH     |

|                                |   |   |    |   |    |   |   |   |   |    |   |    |    |   |   |    |      |          |
|--------------------------------|---|---|----|---|----|---|---|---|---|----|---|----|----|---|---|----|------|----------|
| 2013, Laurent Et al            | Y | Y | Y  | Y | Y  | N | N | Y | Y | NA | Y | NR | NA | Y | 9 | 12 | 0.75 | HIGH     |
| 2013, Kihal-Talantikite Et al. | Y | Y | Y  | Y | CD | N | N | Y | Y | NA | Y | NR | NA | Y | 8 | 12 | 0.67 | MODERATE |
| 2013, Markevych Et al.         | Y | Y | Y  | Y | Y  | N | N | Y | Y | NA | Y | NR | NA | Y | 9 | 12 | 0.75 | HIGH     |
| 2012, Dadvand Et al.           | Y | Y | Y  | Y | N  | N | N | Y | Y | NA | Y | NR | NA | Y | 8 | 12 | 0.67 | MODERATE |
| 2011, Dadvand Et al.           | Y | Y | Y  | Y | N  | N | N | Y | Y | NA | Y | NR | NA | Y | 8 | 12 | 0.67 | MODERATE |
| 2010, Donovan Et al.           | Y | Y | CD | Y | Y  | N | N | Y | Y | NA | Y | NR | NA | Y | 8 | 12 | 0.67 | MODERATE |

Table S2. Quality Assessment

\*CD, cannot determine; NA, not applicable; NR, not reported; Y, yes; N, no

| <b>Year, Author, Title</b>  | <b>Country</b> | <b>Aims</b>                                                                                                                                                   | <b>Study design</b> | <b>Population, Time Frame</b>           | <b>Exposure</b>                                                                                                                                    | <b>Outcome</b>                               | <b>Mediation/ effect modification</b>                                                                                                                                                 | <b>Main findings</b>                                                                                                                                                             |
|-----------------------------|----------------|---------------------------------------------------------------------------------------------------------------------------------------------------------------|---------------------|-----------------------------------------|----------------------------------------------------------------------------------------------------------------------------------------------------|----------------------------------------------|---------------------------------------------------------------------------------------------------------------------------------------------------------------------------------------|----------------------------------------------------------------------------------------------------------------------------------------------------------------------------------|
| <b>2019, Asta et al.</b>    | Italy          | To analyse the effect of greenness on the association between exposure heat and air pollution and preterm birth                                               | Cross-sectional     | 56,576 singleton live births, 2001-2013 | residential proximity to green spaces and the Normalized Difference Vegetation Index (NDVI) within a 100m buffer of a mother's residential address | Preterm birth (PTB)                          | The association between heat exposure and preterm was modified by Socio-economic position (SEP) and residential proximity to green spaces. No effect modification was found for NDVI. | Exposure to increased heat and PM <sub>10</sub> was associated with increase probability of preterm births.                                                                      |
| <b>2019, Choe et al.</b>    | USA            | To analyse the effect of residential natural and built environment's features on gestational diabetes mellitus (GDM), gestational hypertension, pre-eclampsia | Cross-sectional     | 61,640 women, 2002-2012                 | Mother's residential proximity to recreational facilities, proximity to fresh water and coasts                                                     | GDM, gestational hypertension, pre-eclampsia | NA                                                                                                                                                                                    | Living within 1 km of the coast was associated with lower odds of GDM. Living within 500 m of a recreational facility was associated with lower odds of gestational hypertension |
| <b>2019, Donovan et al.</b> | USA            | To analyse the impact of residential greenness on Small for gestational age (SGA), PTB, very                                                                  | Cross-sectional     | 14,682 singleton live births            | Metrics from LIDAR and those based on NDVI within 60m, 120m and 240m buffer of a mother's                                                          | SGA, PTB, VPTB                               | NA                                                                                                                                                                                    | The mean of vegetation height and variation in vegetation height was associated with lower odds of SGA. Green space metrics                                                      |



|                              |                | preterm birth (VPTB)                                                                                       |                 |                                                                                    | residential address                                                            |                                           |                                                                                                                                                                                                   | were not associated with PTB or VPTB                                                                                                                |
|------------------------------|----------------|------------------------------------------------------------------------------------------------------------|-----------------|------------------------------------------------------------------------------------|--------------------------------------------------------------------------------|-------------------------------------------|---------------------------------------------------------------------------------------------------------------------------------------------------------------------------------------------------|-----------------------------------------------------------------------------------------------------------------------------------------------------|
| <b>2019, Dzhambov et al.</b> | Austria, Italy | To investigate the relation of residential greenness, traffic noise and air pollution with birth outcomes. | Cross-sectional | 1091 cases (573 from UIT, 518 from BBT).                                           | NDVI within 100m, 300m, 500m and 1000m around the mother's residential address | BW, LBW, PTB, SGA                         | In UIT sample, the association between greenness and birthweight was stronger among first born babies and when the air pollution level was low. In BBT sample, altitude modified the association. | In the Lower Inn Valley, greenness was associated with lower odds of LBW and SGA whereas, in BBT the association was not statistically significant. |
| <b>2019, Eriksson et al.</b> | Sweden         | To investigate association between NDVI and birth outcomes.                                                | Cross-sectional | Birth weight (n=2619), birth length (n=2490), head circumference (2243), 1994-1996 | NDVI within 500-m buffers around residential address                           | BW, birth length, head circumference, SGA | NDVI was associated with increased birth weight among those from suburban areas.                                                                                                                  | There was no association between NDVI and birth weight, birth length or head circumference.                                                         |
| <b>2019, Laurent et al.</b>  | USA            | To investigate association between LBW and residential greenness.                                          | Case-cohort     | 72,632 LBW cases, 2001-2008                                                        | NDVI within 500-m buffers around residential address                           | Term low birth weight (TLBW)              | Fine particulate matter partly mediated (%12) the association between NDVI and LBW.                                                                                                               | Increase of NDVI was associated with lower odds of LBW.                                                                                             |
| <b>2019, Liao et al.</b>     | China          | To investigate the association between residential greenness and Maternal blood glucose levels,            | Cohort          | 6807 pregnant women, 2012-2015                                                     | NDVI within 300-m buffers around residential address                           | Maternal blood glucose levels, IGT , GDM  | PM2.5 partly mediated the association between residential NDVI and maternal                                                                                                                       | Increase of NDVI was associated with decrease of maternal fasting glucose levels,                                                                   |

|                                    |                                              |                                                                                           |                 |                                     |                                                                                                                                                    |                  |                                                |                                                                                          |
|------------------------------------|----------------------------------------------|-------------------------------------------------------------------------------------------|-----------------|-------------------------------------|----------------------------------------------------------------------------------------------------------------------------------------------------|------------------|------------------------------------------------|------------------------------------------------------------------------------------------|
|                                    |                                              | impaired glucose tolerance (IGT) , gestational diabetes mellitus (GDM)                    |                 |                                     |                                                                                                                                                    |                  | fasting glucose levels.                        | lower risks of IGT and GDM.                                                              |
| <b>2019, Madhloum et al.</b>       | Belgium                                      | To investigate the association between newborn blood pressure (BP) and land use indicator | Cross-sectional | 427 mother-newborn pairs, 2014-2016 | Residential greenness within 5 km buffer of the residential address                                                                                | Newborn BP       | NA                                             | Increment in greenness percent was associated with lower systolic and lower diastolic BP |
| <b>2019, Nieuwenhuijsen et al.</b> | UK, France, Spain, Lithuania, Norway, Greece | To analyse association between urban exposome and birth weight.                           | Cross-sectional | 31,458 singleton pregnancies        | NDVI within 100-m,300-m,and 500-m buffers around residential address                                                                               | BW, TLBW         | NA                                             | Increased level of NDVI was associated with increased birth weight                       |
| <b>2019, Schinasi et al.</b>       | USA                                          | The association between greenness and infant mortality                                    | Cross-sectional | 2010-2014                           | NDVI within 250-m buffers in each census tract                                                                                                     | Infant mortality | No interactions were statistically significant | Increase of NDVI was associated with reduced rate of infant mortality                    |
| <b>2019, Seabrook et al.</b>       | Canada                                       | To investigate influence of environmental factors on LBW and PTB                          | Cohort          | 25,263 live births, 2009-2014       | Percentage of park and recreation land use to all land uses within 500 m of a postal code, NDVI within a 500 m and 1,600 m buffer of a postal code | LBW, PTB         | No interactions were statistically significant | Increase of NDVI was associated with lower odds of LBW                                   |

|                               |        |                                                                                                                                                                 |                 |                                                     |                                                                                                                                                                |                                                                                 |                                                                                                                                                                                          |                                                                                                                                                                                    |
|-------------------------------|--------|-----------------------------------------------------------------------------------------------------------------------------------------------------------------|-----------------|-----------------------------------------------------|----------------------------------------------------------------------------------------------------------------------------------------------------------------|---------------------------------------------------------------------------------|------------------------------------------------------------------------------------------------------------------------------------------------------------------------------------------|------------------------------------------------------------------------------------------------------------------------------------------------------------------------------------|
| <b>2019, Sun et al.</b>       | China  | To investigate the modification effect by residential greenness on the association between maternal exposure to ambient temperature and the risk of miscarriage | Case-control    | 2044 miscarriage cases and 2285 controls, 2014-2016 | NDVI within 500 m and 1000 m from residential address of the mother                                                                                            | Miscarriage                                                                     | The effect of temperature on the risk of miscarriage was less prominent among participants lived in higher amount of greenness compared with those exposed to lower amount of greenness. | Maternal exposure to moderately high temperature was associated with increased risk of miscarriage.                                                                                |
| <b>2019, Yin.</b>             | USA    | To investigate the effect of mother's exposure to residential greenness on BW                                                                                   | Cross-sectional | 138,532 birth, 2000–2002                            | NDVI, percent tree canopy, neighbourhood green index(NHGI) within 100m, 250m, 500m, and 1000m of the residential address of the mother and proximity to parks. | TBW, TLBW                                                                       | The association between greenness and birthweight was stronger among highest SES groups.                                                                                                 | Higher levels of NGHI was associated with increased birth weight. No statistically significant association was observed between greenness metrics and the risk of low birth weight |
| <b>2018, Agay-Shay et al.</b> | Israel | To evaluate association between variance in residential greenness and birth outcomes                                                                            | Cross-sectional | 73221 live births, 2000-2014                        | NDVI and percentage of tree cover at 300 m from mother's residential address                                                                                   | BW, LBW, PTB, very preterm delivery, SGA, appropriate for gestational age (AGA) | Stronger association between higher NDVI and birth weight was found among lower SES groups.                                                                                              | Increase in mean and variance of NDVI was associated with lower odds for low birth weight, small for gestational age and preterm birth. Larger                                     |

|                                |        |                                                                                                    |                    |                                       |                                                                                                    |                                     |                                                                                                                         |                                                                                                                                    |
|--------------------------------|--------|----------------------------------------------------------------------------------------------------|--------------------|---------------------------------------|----------------------------------------------------------------------------------------------------|-------------------------------------|-------------------------------------------------------------------------------------------------------------------------|------------------------------------------------------------------------------------------------------------------------------------|
|                                |        |                                                                                                    |                    |                                       |                                                                                                    |                                     |                                                                                                                         | number of trees were associated with increased birth weight.                                                                       |
| <b>2018, Cusack et al.</b>     | Canada | To examine associations between mother's residential green space and term birth weight             | Cross-sectional    | 2510 births, 2009-2012                | NDVI within 100 m, 250 m, 500 m, 1000 m from residential address of the mother                     | TBW                                 | Stronger association between NDVI and birth weight was found among higher SES groups.                                   | Association between NDVI and birth weight was positive but not statistically significant. Pathways did not explain the association |
| <b>2018, C. Fong et al.</b>    | USA    | to investigate the relationship between residential greenness and birthweight                      | Cross-sectional    | n=780,435, 2001-2013                  | NDVI within 250 m from the mother's residential address                                            | TBW, TLBW, SGA                      | TLBW and SGA appeared stronger among population with higher SES groups.                                                 | Greenness was associated with higher term birthweight lower odds of TLBW and SGA.                                                  |
| <b>2018, Glazer et al.</b>     | USA    | to investigate association between green and blue space and birth outcomes in a coastal area       | Cross-sectional    | 61,640 mother-infant pairs, 2001-2012 | NDVI within 150, 250, 500 m from the residence of the mother, residential proximity to fresh water | Gestational age (GA), PTB, TBW, SGA | lower odds of preterm birth associated with residential proximity to freshwater among those in the highest NSES tertile | Higher birth weight and living near to fresh body was associated.                                                                  |
| <b>2017, Richardson Et al.</b> | UK     | To investigate whether changing mother's exposure to natural space between births has effect on BW | quasi-experimental | 40 194 singleton births, 1991-2010    | natural space (total, accessible, parks, woods and open water) within                              | BW                                  | Association was stronger among motherS who had already children before and had high education                           | Association found between BW and total amount of natural space, however specific                                                   |

|                                 |             |                                                                                                                                       |                 |                                |                                                                                                             |                                    |                                                                                                               |                                                                                                                                        |
|---------------------------------|-------------|---------------------------------------------------------------------------------------------------------------------------------------|-----------------|--------------------------------|-------------------------------------------------------------------------------------------------------------|------------------------------------|---------------------------------------------------------------------------------------------------------------|----------------------------------------------------------------------------------------------------------------------------------------|
|                                 |             |                                                                                                                                       |                 |                                | 100 m buffer from the mother's residence at the time of birth                                               |                                    |                                                                                                               | types of natural space does not show association.                                                                                      |
| <b>2017a, Nichani Et al.</b>    | New Zealand | To investigate if mother's exposure to green space during pregnancy has effect on BW and GA                                           | Cross-sectional | 5091 mother-newborn, 2007-2010 | The percentage of green space in each urban or rural census area unit (CAU) was used                        | BW, GA                             | Green space and gestational age association exists among infants of women with the lowest level of education. | in fully adjusted models association between green space and birth outcomes is not statistically significant among general population. |
| <b>2017b, Nichani et al.</b>    | New Zealand | To investigate association between exposure to green space during pregnancy associated and depression and identify moderating factors | Cross-sectional | 6772 women, 2009-2010          | Proportion of Green space within a census area unit                                                         | Antenatal and postnatal depression | No interactions were statistically significant                                                                | No significant association was found between neonatal depression and green space                                                       |
| <b>2017, Cusack, L., et al.</b> | US          | Investigate how contextual and population differences affected green space associations with birth weight                             | Cross-sectional | N=3026603, 2005-2009           | NDVI, % tree cover, % green space, % street tree within 50-1000 m buffer distances from mothers residential | TBW                                | Maternal race, ethnicity and education has largest effect on the association                                  | consistent positive associations were observed for the high density areas of both cities using                                         |

|                                              |    |                                                                                                                  |                       |                                           |                                                                                                                                                                       |                                                                |                                                                                           |                                                                                                                                 |
|----------------------------------------------|----|------------------------------------------------------------------------------------------------------------------|-----------------------|-------------------------------------------|-----------------------------------------------------------------------------------------------------------------------------------------------------------------------|----------------------------------------------------------------|-------------------------------------------------------------------------------------------|---------------------------------------------------------------------------------------------------------------------------------|
|                                              |    |                                                                                                                  |                       |                                           | address, and access to parks                                                                                                                                          |                                                                |                                                                                           | several green space metrics at small buffer distances                                                                           |
| <b>2017, Abelt, K., &amp; McLafferty, S.</b> | US | To investigate maternal exposure to green and blue spaces and adverse birth outcomes                             | Cross-sectional       | mothers n = 103,484, 2000                 | NDVI within 100 m, 250 m, and 500 m circular buffers from mother's residence, number of street trees, and access to major green spaces, proximity to waterfront areas | PTB, TBW, TLBW and SGA                                         | Positive association was observed between NDVI and odds of SGA among deprived populations | Significant association between street trees nearby residential area and PTB prevalence was observed not with other metrics.    |
| <b>2016, Young Et al.</b>                    | US | To determine the risk of gestational diabetes (GDM) and preeclampsia associated with various community resources | ecological study      | all singleton birth records 2007- 2008    | Fast food restaurants, supermarkets, grocery stores, gyms, health clubs and green space                                                                               | prevalence risk of gestational diabetes (GDM) and preeclampsia | Not reported                                                                              | The distribution of community resources has significant association with the risk of developing GDM while not with preeclampsia |
| <b>2016, Ebisu Et al.</b>                    | US | To investigate associations between urban and green land-use and birth weight                                    | Cross-sectional study | 239,811 birth certificate data, 2000-2006 | PM2.5, traffic exposure (highways that are 2 km from the residence of mother)                                                                                         | TBW, TLBW, SGA                                                 | Results did not provide strong evidence of effect modification by maternal race and SES   | There is protective associations by green space on birth outcomes and                                                           |

|                                         |           |                                                                                                       |                 |                            |                                                                                                    |                                      |                                                                                                                |                                                                                                                                                              |
|-----------------------------------------|-----------|-------------------------------------------------------------------------------------------------------|-----------------|----------------------------|----------------------------------------------------------------------------------------------------|--------------------------------------|----------------------------------------------------------------------------------------------------------------|--------------------------------------------------------------------------------------------------------------------------------------------------------------|
|                                         |           |                                                                                                       |                 |                            | proportion of greenness within 250 m from mother's address                                         |                                      |                                                                                                                | urban space showed negative association with birth outcomes                                                                                                  |
| <b>2016, Cusack Et al.</b>              | US        | To investigate association between residential greenness and birth outcomes                           | Cross-sectional | 3,026,603 births 2000-2009 | NDVI within 250 m from mother's residence                                                          | PTB, TBW, SGA                        | Maternal and paternal race, ethnicity and education had the largest impact on reducing associations.           | No consistent associations between residential greenness and birth outcomes in adjusted models.                                                              |
| <b>2016, Casey Et al.</b>               | US        | To investigate association between prenatal residential greenness and birth outcomes                  | Cross-sectional | 12,821 infants 2006–2013   | NDVI 250 m and the 1250 m radius including and surrounding the home address                        | TBW, SGA, PTB, 5 min Low Apgar score | No modification by Medical Assistance or CSD                                                                   | greater greenness was associated with lower odds of preterm and small for gestational age among mothers in cities but not with TBW and 5 min Low Apgar score |
| <b>2015, Grazuleviciene, R., et al.</b> | Lithuania | To investigate association between residential greenness or distance to city parks and birth outcomes | Cohort          | N=3292, 2007-2009          | NDVI buffers within 100 m, 300 m, and 500 m of each maternal residence and distance to a city park | BW, TLBW, LBW, GA, PTB,              | The beneficial park effect on foetal growth is most apparent in the environment with low surrounding greenness | Longer distances to city parks was associated with an increased risk of PB and smaller GA. Association was found between low                                 |

|                              |        |                                                                                                                                                            |                 |                                                                  |                                                                                                               |                                      |                                                                                                                                      |                                                                                                                                         |
|------------------------------|--------|------------------------------------------------------------------------------------------------------------------------------------------------------------|-----------------|------------------------------------------------------------------|---------------------------------------------------------------------------------------------------------------|--------------------------------------|--------------------------------------------------------------------------------------------------------------------------------------|-----------------------------------------------------------------------------------------------------------------------------------------|
|                              |        |                                                                                                                                                            |                 |                                                                  |                                                                                                               |                                      |                                                                                                                                      | surrounding greenness and TLBW                                                                                                          |
| <b>2015, McEachan Et al.</b> | UK     | To investigate association between green space and depression during pregnancy and to investigate moderating and mediating variables                       | Cross-sectional | 7547 women during pregnancy period, 2007-2011                    | NDVI within 100 m, 300 m and 500 m buffer zones around participant addresses and access to major green spaces | depressive symptoms during pregnancy | Associations may be stronger for more disadvantaged groups and for those who are already physically active                           | Pregnant women in the greener quintiles were 18–23% less likely to report depressive symptoms compare to those in the least green areas |
| <b>2014, Hystad Et al.</b>   | Canada | to investigate associations between residential greenness and birth outcomes and evaluate the influence of built environment factors on these associations | Cross-sectional | birth outcomes in a cohort of 64,705 singleton births, 1999-2002 | NDVI for each address was calculated within 100m, 250m. Residential noise exposure. Neighbourhood walkability | PTB, VPTB, TBW, SGA                  | After adjustment of air pollution and noise exposures, neighborhood walkability, and park proximity association remained significant | positive association found between residential greenness and birth outcomes.                                                            |
| <b>2014a, Dadvand Et Al.</b> | Spain  | To investigate the association between mothers' residential proximity to major roads and term LBW, and to explore possible                                 | Cross-sectional | 6438 singleton term births, 2001-2005                            | Road proximity (200 m from a major road) air pollution, noise, and heat. Tree coverage in a 200-m buffer      | TLBW, SGA                            | Air pollution and heat exposures mediated the LBW and distance to major roads                                                        | Increased risk of term LBW associated with proximity to major roads.                                                                    |



|                               |        | mediators for this association                                                                                                                                |                 |                                         | around major roads                                                                                                 |                                |                                                                                                          |                                                                                                                                    |
|-------------------------------|--------|---------------------------------------------------------------------------------------------------------------------------------------------------------------|-----------------|-----------------------------------------|--------------------------------------------------------------------------------------------------------------------|--------------------------------|----------------------------------------------------------------------------------------------------------|------------------------------------------------------------------------------------------------------------------------------------|
| <b>2014b, Dadvand Et al.</b>  | UK     | To investigate the association between residential greenness and proximity to green spaces and BW and to explore the potential modifiers for this association | Cross-sectional | 10,780 singleton live-births, 2007-2010 | NDVI within 50 m, 100 m, 250 m, 500 m and 1000 m around maternal residence . Residential proximity to green spaces | BW                             | SES, education and ethnicity mediated the association                                                    | Level of greenness in Residential surrounding is associated with healthier foetal growth.                                          |
| <b>2014, Agay-Shay Et al.</b> | Israel | To investigate associations between surrounding greenness, distance to green spaces and pregnancy outcomes                                                    | Cross-sectional | 39 132 singleton live births, 2000-2006 | NDVI within a buffer of 250m sensitivity analysis 100m and 500m and proximity to major green spaces                | GA, LBW, TLBW, VLBW, PTB, VPTB | Stronger associations were observed among those of lower socioeconomic status.                           | Significant association between greater greenness and BW but not with GA, PTD, VPTD.                                               |
| <b>2013, Laurent Et al.</b>   | US     | To investigate association between green space exposure and preeclampsia                                                                                      | Cross-sectional | 81,186 infants, 1997-2006               | NDVI value in circular buffers of 50, 100 and 150 m radii around homes                                             | TBW,PTB, preclampsia           | Significance disappears for the 100 m buffer after adjustment for NOx, O3 or CO.PM2.5 or traffic density | Association was observed between increased TBW, reduced risk of PB and exposure to greenness. No association with PC was observed. |

|                                       |         |                                                                                                       |                 |                                       |                                                                                                                                           |                                       |                                                                                                                                                                                               |                                                                                                                                                                                         |
|---------------------------------------|---------|-------------------------------------------------------------------------------------------------------|-----------------|---------------------------------------|-------------------------------------------------------------------------------------------------------------------------------------------|---------------------------------------|-----------------------------------------------------------------------------------------------------------------------------------------------------------------------------------------------|-----------------------------------------------------------------------------------------------------------------------------------------------------------------------------------------|
| <b>2013, Kihal-Talantikite Et al.</b> | France  | To investigate the relationship between green spaces and the infant mortality                         | ecological      | All infant deaths ,2000-2009          | Proportion of the geographical area (km2) of green space in the total area)                                                               | All infant deaths (between 2000-2009) | Not reported                                                                                                                                                                                  | After adjusting for greenness and neighborhood deprivation level, high risk cluster of infant mortality disappeared                                                                     |
| <b>2013, Markevych Et al.</b>         | Germany | To investigate association between residential greenness and BW also to explore underlying mechanisms | Cross-sectional | 3203 newborns, 1996-1999              | NDVI within 100-m,250-m, 500-m and 800-m buffers and forests, parks and forests and parks within 500-m buffer from the mother's residence | BW                                    | Strongest association found among mother who have less than 10 years of school education. Association remained significant also after adjusting for noise or maternal stress during pregnancy | Birth weight was positively associated with surrounding greenness in a 500-m buffer around the residence at birth, but not with neighbourhood green spaces within same buffer distance. |
| <b>2012b, Dadvand Et al.</b>          | Spain   | To investigate surrounding greenness and birth outcomes                                               | Cross-sectional | 2393 singleton live births, 2003-2008 | NDVI 100m, 250m, 500m buffers around residence of participants                                                                            | TBW, head circumference, GA           | Stronger associations among children of mothers with lower education, suggesting greater benefits from surrounding greenness                                                                  | There is beneficial effects of surrounding green spaces on measures of birth weight and head circumferences but not pregnancy length                                                    |

|                              |       |                                                                                                                                                          |                 |                                                  |                                                                                                                                        |          |                                                                                                                                              |                                                                                                                                          |
|------------------------------|-------|----------------------------------------------------------------------------------------------------------------------------------------------------------|-----------------|--------------------------------------------------|----------------------------------------------------------------------------------------------------------------------------------------|----------|----------------------------------------------------------------------------------------------------------------------------------------------|------------------------------------------------------------------------------------------------------------------------------------------|
| <b>2012a, Dadvand Et al.</b> | Spain | To investigate surrounding green spaces and distance to major green spaces effect on pregnancy outcomes and to explore effect of SES in this association | Cross-sectional | 8246 birth cohort, 2001-2005                     | NDVI in buffer of 100 m around each maternal place of residence and proximity to major green spaces                                    | BW, GA   | beneficial effect of exposure to green spaces on BW found among the lowest SEP group and those who had less than 10 year of school education | None of the indicators of green exposure was associated with birth weight and gestational age.                                           |
| <b>2010, Donovan Et al.</b>  | US    | To investigate whether there is association between greater tree-canopy cover and reduced risk of unfavorable birth outcomes                             | Cross-sectional | All singleton births in Oregon, 2006-2007 N=5696 | Tree canopy in the 50, 100, and 200m buffers around the centroid of each mother's house was calculated using classified aerial imagery | PTB, SGA | Not reported                                                                                                                                 | Increase in tree-canopy cover within 50 m of a house ,and proximity to a private open space, were associated with a reduced risk of SGA. |

Table S3. Characteristics of studies

| Variables |             |                         | Number of studies | Total number |
|-----------|-------------|-------------------------|-------------------|--------------|
| Exposure  | Green Space | NDVI (satellite images) | 27                | 37           |

Table S4.  
outcome variables

| Study                       | Exposure Type | Buffer Distance | Exposure Type | Outcome              | Increase | SD (green space proxy) | SD (BW) | B     | $\beta$ | SE (B)      | LCI (B) | SE (B) | LCI (B) | UCI (B) |        |
|-----------------------------|---------------|-----------------|---------------|----------------------|----------|------------------------|---------|-------|---------|-------------|---------|--------|---------|---------|--------|
|                             |               |                 |               |                      |          |                        |         |       |         |             |         |        |         |         | 9      |
| 2019, Eriksson et al.       | NDVI          | 500 m           | IQR increase  | Hypertension         | 0.167    | 0.06                   | 484     | 7.3   | 0.0037  | 30.10       | 66.2    | -51.7  | 0.0040  | -0.0064 | 0.0082 |
| 2019, Dzhambov et al        | UIT survey    | 300 m           | IQR increase  | Preeclampsia         | 0.189    | 0.14                   | 528.76  | 61.64 | 0.016   | 33.194      | 126.7   | -3.42  | 0.0088  | -0.0009 | 0.0340 |
|                             | BBT survey    | 300 m           | IQR increase  | Gestational Diabetes | 0.148    | 0.11                   | 564.71  | 12.32 | 0.0024  | 26.852      | 64.95   | -40.31 | 0.0052  | -0.0078 | 0.013  |
| 2019, Yin.                  | NDVI          | 100 m           | IQR increase  | Depressive Symptoms  | 0.1349   | 0.1                    | 472.1   | 2.06  | 0.0004  | 1.727040816 | 5.44    | -1.33  | 0.0004  | -0.0003 | 0.0012 |
| 2019, Nieuwenhuijsen et al. | NDVI          | 300 m           | IQR increase  |                      | 0.175    | 0.1                    | 546.6   | 30.7  | 0.0056  | 4.184       | 38.9    | 22.5   | 0.0008  | 0.0041  | 0.0071 |
| 2018, Agay-Shay et al       | NDVI          | 300 m           | Tertiles      |                      | 0.02698  | 0.03                   | 534     | 19.6  | 0.0011  | 4.413       | 21.5    | 4.2    | 0.0002  | 0.0006  | 0.0016 |

|                             |          |                                   |                        |                                                    |                                   |       |              |      |                 |            |       |       |        |                  |        |
|-----------------------------|----------|-----------------------------------|------------------------|----------------------------------------------------|-----------------------------------|-------|--------------|------|-----------------|------------|-------|-------|--------|------------------|--------|
| 2018, Cusack et al          |          | NDVI                              | 250 m                  | IQR increase                                       | 0.1                               | 0.11  | 498          | 12.7 | 0.002           | 12.3<br>72 | 36.9  | -11.6 | 0.0027 | -<br>0.00<br>26  | 0.0082 |
| 2018, Fong et al            |          | NDVI                              | 250 m                  | 0.1 unit<br>increase of<br>mean NDVI,<br>Q4 vs. Q1 | 0.22                              | 0.05  | 468          | 4.63 | 0.000<br>5      | 1.02<br>8  | 4.1   | 0.1   | 0.0001 | 0.00<br>028      | 0.0007 |
| 2018, Glazer et al.         |          | NDVI                              | 250 m                  | IQR<br>increase,<br>SD:0.15                        | 0.20235                           | 0.15  | 563          | 7.7  | 0.002<br>1      | 4.18<br>4  | 15.9  | -0.5  | 0.0011 | -<br>0.00<br>013 | 0.0042 |
| 2017,<br>Cusack et<br>al.   | Austin   | NDVI                              | 250 m                  | IQR increase                                       | 0.1                               | 0.119 | 447.7        | -3   | -<br>0.000<br>8 | 2.3        | 4.2   | -7.5  | 0.0006 | -<br>0.00<br>199 | 0.0004 |
|                             | Portland | NDVI                              | 250 m                  | IQR increase                                       | 0.1                               | 0.133 | 456.7        | 1.2  | 0.000<br>4      | 2.3        | 1.3   | -3.3  | 0.0007 | -<br>0.00<br>098 | 0.0017 |
| 2017, Abelt Et al.          |          | NDVI                              | 250 m                  | increase in<br>mean NDVI<br>SD:0.10                | 0.1349                            | 0.1   | 477.01       | 9.01 | 0.001<br>9      | 4.60<br>1  | -32.4 | 50.4  | 0.0010 | 0                | 0.0038 |
| 2016, Ebisu et al.          |          | Green<br>space (land<br>use data) | 250 m                  | IQR increase                                       | 0.38                              | 0.29  | 463.5        | 3.2  | 0.002<br>0      | 1.42<br>9  | 6.0   | 0.4   | 0.0009 | 0.00<br>03       | 0.0038 |
| 2016, Cusack et al.         |          | NDVI                              | 250 m                  | Quantiles of<br>NDVI (Q1,<br>Q2, Q3 and<br>Q4),    | IQR=0.15                          | 0.111 | 485.04<br>74 | 1.9  | 0.000<br>4      | 0.91<br>8  | 3.7   | 0.1   | 0.0002 | 0.00<br>002      | 0.0008 |
| 2016, Casey et al.          |          | NDVI                              | 250 m                  | Tertiles                                           | tertile cut<br>off point:<br>0.43 | 0.05  | 485.04<br>74 | 42   | 0.004<br>3      | 21.9<br>39 | 85.0  | -1.0  | 0.0023 | -<br>0.00<br>01  | 0.0088 |
| 2015, Grazuleviciene et al. |          | NDVI                              | 300 m                  | IQR increase                                       | 0.09                              | 0.066 | 527.85       | 11.2 | 0.001<br>4      | 9.20<br>0  | 25.5  | -3.1  | 0.0012 | -<br>0.00<br>085 | 0.0037 |
| 2014, Haystad et al.        |          | NDVI                              | 100 m and<br>250m were | IQR increase                                       | 0.1                               | 0.08  | 472          | 20.6 | 0.003<br>5      | 2.09<br>2  | 24.7  | 16.5  | 0.0004 | 0.00<br>2797     | 0.0042 |

|                         |                             | highly correlated  |              |        |       |          |       |         |        |      |       |        |          |         |
|-------------------------|-----------------------------|--------------------|--------------|--------|-------|----------|-------|---------|--------|------|-------|--------|----------|---------|
| 2014, Agay-Shay et al.  | NDVI                        | 250 m              | IQR increase | 0.0578 | 0.04  | 427.6    | 19.2  | 0.0018  | 3.010  | 25.1 | 13.3  | 0.0003 | 0.001244 | 0.0023  |
| 2014b, Dadvand et al.   | NDVI                        | 250 m              | IQR increase | 0.15   | 0.111 | 489.2513 | 16.2  | 0.0037  | 7.423  | 30.8 | 1.7   | 0.0017 | 0.000375 | 0.0070  |
| 2013, Laurent et al.    | NDVI                        | 150m               | IQR increase | 0.131  | 0.11  | 485.0474 | 0.59  | 0.0001  | 1.291  | 3.1  | -2.0  | 0.0003 | -0.00044 | 0.0007  |
| 2014, Markevych et al.  | NDVI                        | 250 m              | IQR increase | 0.107  | 0.09  | 423.2    | 18.3  | 0.0039  | 8.954  | 35.8 | 0.7   | 0.0019 | 0.000159 | 0.0076  |
| 2012b, Dadvand et al.   | NDVI                        | 250 m              | IQR increase | 0.188  | 0.14  | 480.9    | 29.2  | 0.0085  | 14.133 | 56.9 | 1.5   | 0.0041 | 0.000437 | 0.0166  |
| 2012a, Dadvand et al.   | NDVI                        | 100 m              | 10% increase | 0.008  | 0.03  | 547      | -19.8 | -0.0011 | 24.413 | 28.1 | -67.6 | 0.0013 | -0.00371 | 0.0015  |
| 2017a, Nichani et al.   | Green space (land use data) | Census unit        | IQR increase | 26%    | 28    | 509      | 12.16 | 0.6689  | 7.742  | 27.3 | -3.01 | 0.4259 | -0.16585 | 1.5037  |
| 2017, Richardson et al. | Green space (land use data) | 100 m <sup>a</sup> | IQR increase | 18.9 % | 14.01 | 518.9029 | 8.19  | 0.2211  | 2.939  | 14.0 | 2.4   | 0.0793 | 0.06561  | 0.37665 |

Table S5. Extracted data and effect size computations for meta-analysis on birth weight ;SD- standard deviation; BW- birth weight; B-unstandardized regression coefficient ; $\beta$ -standardized regression coefficient; SE-standard error; UCI: upper 95% confidence interval; LCI- lower 95% confidence interval.

\*<sup>a</sup> Buffer distance is calculated from postcodes (the buffer distance is calculated from point address of mother's residence in other studies)

| <b>Study</b>                   | <b><math>\beta</math> for 10% increase in green space proxies</b> | <b>LCI(<math>\beta</math>)</b> | <b>UCI(<math>\beta</math>)</b> | <b>SE(<math>\beta</math>)</b> |
|--------------------------------|-------------------------------------------------------------------|--------------------------------|--------------------------------|-------------------------------|
| 2019, Eriksson et al.          | 0.00008                                                           | -0.00008                       | 0.0002                         | 0.0004                        |
| 2019, Dzhambov et al. (UIT)    | 0.0033                                                            | -0.0002                        | 0.0068                         | 0.0088                        |
| 2019, Dzhambov et al (BBT)     | 0.00048                                                           | -0.0016                        | 0.0025                         | 0.0052                        |
| 2019, Yin.                     | 0.00018                                                           | -0.0013                        | 0.0016                         | 0.0037                        |
| 2019, Nieuwenhuijsen et al.    | 0.0011                                                            | 0.0008                         | 0.0014                         | 0.0008                        |
| 2018, Cusack et al.            | 0.0006                                                            | -0.0005                        | 0.0016                         | 0.0027                        |
| 2018, Fog C. et al.            | 0.0002                                                            | 0.0001                         | 0.0003                         | 0.0001                        |
| 2018, Glazer et al.            | 0.0004                                                            | 0.0000                         | 0.0008                         | 0.0011                        |
| 2017, Cusack et al. (Portland) | -0.0002                                                           | -0.0004                        | 0.0001                         | 0.0006                        |
| 2017, Cusack et al. (Austin)   | 0.0001                                                            | -0.0002                        | 0.0003                         | 0.0007                        |
| 2015, Grazuleviciene et al.    | 0.0003                                                            | -0.0002                        | 0.0007                         | 0.0012                        |
| 2014, Agay-Shay et al.         | 0.0004                                                            | 0.0002                         | 0.0005                         | 0.0003                        |
| 2014, Hystad et al.            | 0.0007                                                            | 0.0006                         | 0.0008                         | 0.0004                        |
| 2014b, Dadvand et al.          | 0.0007                                                            | 0.0001                         | 0.0014                         | 0.0017                        |
| 2013, Markevych et al.         | 0.0008                                                            | 0.0000                         | 0.0015                         | 0.0019                        |
| 2013, Laurent et al.           | 0.0000                                                            | -0.0001                        | 0.0001                         | 0.0003                        |
| 2012, Dadvand et al. et al.    | 0.0017                                                            | 0.0001                         | 0.0033                         | 0.0041                        |
| 2011, Dadvand et al.           | -0.0011                                                           | -0.0037                        | 0.0015                         | 0.0013                        |

Table S6. Effect size computations for meta-analysis on birth weight based on 10% increase in green space proxies (NDVI and green space percentage) ;a: buffer distance is calculated from postcodes while the buffer distance is calculated from point address of mother's residence in other

studies;  $\beta$ -standardized regression coefficient; LCI- lower 95% confidence interval ; UCI- upper 95% confidence interval; SE- standard error.

| <b>Study</b>                    | <b><math>\beta</math></b> | <b>LCI<br/>95%</b> | <b>UCI<br/>95%</b> | <b>weight<br/>(%)</b> |
|---------------------------------|---------------------------|--------------------|--------------------|-----------------------|
| 2019, Yin.                      | 0.00008                   | -0.00006           | 0.0002             | 9.55                  |
| 2019, Dzhambov et al.<br>(UIT)  | 0.0033                    | -0.00018           | 0.007              | 0.64                  |
| 2019, Dzhambov et al<br>(BBT)   | 0.00048                   | -0.0016            | 0.0025             | 0.67                  |
| 2019, Eriksson et al.           | 0.00018                   | -0.0013            | 0.0016             | 0.71                  |
| 2019, Nieuwenhuijsen et<br>al.  | 0.0011                    | 0.0008             | 0.0014             | 3.17                  |
| 2018, Cusack et al              | 0.0006                    | -0.0005            | 0.0016             | 1.04                  |
| 2018, Fong C. et al             | 0.0002                    | 0.0001             | 0.0003             | 26.32                 |
| 2018, Glazer et al.             | 0.0004                    | -0.00003           | 0.0008             | 2.04                  |
| 2017, Cusack et al.<br>Portland | -0.0002                   | -0.0004            | 0.00008            | 4.87                  |
| 2017, Cusack et al. Austin      | 0.00007                   | -0.0002            | 0.0003             | 4.08                  |
| 2015, Grazuleviciene et al.     | 0.0003                    | -0.0002            | 0.0007             | 1.70                  |
| 2014, Agay-Shay et al.          | 0.0004                    | 0.0002             | 0.0005             | 19.66                 |
| 2014, Hystad et al.             | 0.0007                    | 0.0006             | 0.0008             | 14.60                 |
| 2014b, Dadvand et al.           | 0.0007                    | 0.00007            | 0.001              | 1.37                  |
| 2013, Markevych et al.          | 0.0007                    | 0.00003            | 0.002              | 1.25                  |
| 2013, Laurent et al.            | 0.00003                   | -0.00009           | 0.0001             | 18.25                 |
| 2012, Dadvand et al.            | 0.0018                    | 0.00009            | 0.003              | 0.84                  |
| 2011, Dadvand et al.            | -0.001                    | -0.004             | 0.0015             | 0.79                  |
|                                 |                           |                    |                    |                       |
| Pooled                          | 0.00031                   | 0.00007            | 0.00055            | 100                   |
| Statistics                      |                           |                    |                    |                       |
| I-squared                       | 88.28                     | 82.08              | 92.33              |                       |
| Cochran's Q                     | 110.90                    |                    |                    |                       |

Table S7. Meta-analysis result for effect of 10% increase in green space proxies (NDVI and green space percentage) on birthweight (excluding Agay-Shay et al (2018), Abelt (2017), Cusack et al (2016), Casey et al (2016));  $\beta$ -standardized regression coefficient; LCI- lower 95% confidence interval ; UCI- upper 95% confidence interval.



| <b>Study</b>                 | <b><math>\beta</math> for 0.1 unit increase in NDVI</b> | <b>LCI(<math>\beta</math>)</b> | <b>UCI(<math>\beta</math>)</b> | <b>SE(<math>\beta</math>)</b> |
|------------------------------|---------------------------------------------------------|--------------------------------|--------------------------------|-------------------------------|
| 2019, Yin.                   | 0.0003                                                  | -0.0002                        | 0.0008                         | 0.0004                        |
| 2019, Dzhambov et al. (UIT)  | 0.0086                                                  | -0.0005                        | 0.0178                         | 0.0088                        |
| 2019, Dzhambov et al (BBT)   | 0.0016                                                  | -0.0053                        | 0.0085                         | 0.0052                        |
| 2019, Eriksson et al.        | 0.0004                                                  | -0.0029                        | 0.0036                         | 0.0038                        |
| 2019, Nieuwenhuijsen et al.  | 0.003                                                   | 0.002                          | 0.004                          | 0.0008                        |
| 2018, Cusack et al           | 0.003                                                   | -0.003                         | 0.008                          | 0.003                         |
| 2018, Fong C. et al          | 0.0002                                                  | 0.000                          | 0.000                          | 0.0001                        |
| 2018, Glazer et al.          | 0.001                                                   | 0.000                          | 0.002                          | 0.001                         |
| 2017, Cusack et al. Portland | -0.0008                                                 | -0.002                         | 0.000                          | 0.0006                        |
| 2017, Cusack et al. Austin   | 0.0004                                                  | -0.001                         | 0.002                          | 0.0007                        |
| 2015, Grazuleviciene et al.  | 0.0016                                                  | -0.001                         | 0.004                          | 0.001                         |
| 2014, Agay-Shay et al.       | 0.0031                                                  | 0.002                          | 0.004                          | 0.0003                        |
| 2014, Hystad et al.          | 0.0035                                                  | 0.003                          | 0.004                          | 0.0002                        |
| 2014b, Dadvand et al.        | 0.0025                                                  | 0.000                          | 0.005                          | 0.002                         |
| 2013, Markevych et al.       | 0.0036                                                  | 0.000                          | 0.007                          | 0.002                         |
| 2013, Laurent et al.         | 0.0001                                                  | 0.000                          | 0.001                          | 0.0003                        |
| 2012b, Dadvand et al.        | 0.0045                                                  | 0.000                          | 0.009                          | 0.004                         |
| 2012a, Dadvand et al.        | -0.0140                                                 | -0.046                         | 0.019                          | 0.001                         |

Table S8. Effect size computations for meta-analysis on birth weight based on 0.1 unit increase in NDVI;  $\beta$ -standardized regression coefficient; LCI- lower 95% confidence interval; UCI- upper 95% confidence interval; SE- standard error.

| <b>Study</b>                | <b><math>\beta</math> for 0.1 unit increase in NDVI</b> | <b>LCI(<math>\beta</math>)</b> | <b>UCI(<math>\beta</math>)</b> | <b>weight (%)</b> |
|-----------------------------|---------------------------------------------------------|--------------------------------|--------------------------------|-------------------|
| 2019, Yin.                  | 0.0003                                                  | -0.0002                        | 0.0008                         | 2.93              |
| 2019, Dzhambov et al. (UIT) | 0.009                                                   | -0.0005                        | 0.018                          | 0.65              |
| 2019, Dzhambov et al (BBT)  | 0.0016                                                  | -0.0053                        | 0.009                          | 0.66              |
| 2019, Eriksson et al.       | 0.0004                                                  | -0.0029                        | 0.004                          | 0.71              |
| 2019, Nieuwenhuijsen et al. | 0.003                                                   | 0.002                          | 0.004                          | 1.83              |
| 2018, Cusack et al          | 0.003                                                   | -0.003                         | 0.008                          | 0.96              |

|                                 |        |        |       |       |
|---------------------------------|--------|--------|-------|-------|
| 2018, Fog C. et al              | 0.000  | 0.000  | 0.000 | 78.66 |
| 2018, Glazer et al.             | 0.001  | 0.000  | 0.002 | 1.58  |
| 2017, Cusack et al.<br>Portland | -0.001 | -0.002 | 0.000 | 1.46  |
| 2017, Cusack et al.<br>Austin   | 0.000  | -0.001 | 0.002 | 1.36  |
| 2015, Grazuleviciene            | 0.002  | -0.001 | 0.004 | 0.91  |
| 2014, Agay-Shay                 | 0.003  | 0.002  | 0.004 | 1.75  |
| 2014, Hystad                    | 0.003  | 0.003  | 0.004 | 2.85  |
| 2014, Dadvand (in)B             | 0.002  | 0.000  | 0.005 | 1.09  |
| 2013, Markevych                 | 0.004  | 0.000  | 0.007 | 1.00  |
| 2013, Laurent                   | 0.000  | 0.000  | 0.001 | 4.82  |
| 2012, Dadvand                   | 0.005  | 0.000  | 0.009 | 0.88  |
| 2011, Dadvand                   | -0.014 | -0.046 | 0.019 | 0.84  |
|                                 |        |        |       |       |
| Pooled                          | 0.0004 | -0.002 | 0.003 | 100   |
| Statistics                      |        |        |       |       |
| I-squared                       | 92.73  | 89.48  | 94.97 |       |
| Cochran's Q                     | 178.73 |        |       |       |
| Chi2, p                         | 0      |        |       |       |
| Q-Index                         | 12.90  |        |       |       |

Table S9. Meta-Analysis result for the effect of 0.1 unit NDVI increase on birthweight (excluding Agay-Shay et al (2018), Abelt et al(2017), Cusack et al(2016), Casey et al(2016));  $\beta$ -standardized regression coefficient LCI- lower 95% confidence interval; UCI- upper 95% confidence interval; SE- standard error.

| Year, Author                | Exposure Type | Buffer Distance | Exposure description | IQR unit | estimate type | effect estimate calculated | LCI (OR) | UCI (OR) | QI   | $\beta$ | LCI ( $\beta$ ) | UCI ( $\beta$ ) | SE ( $\beta$ ) |
|-----------------------------|---------------|-----------------|----------------------|----------|---------------|----------------------------|----------|----------|------|---------|-----------------|-----------------|----------------|
| 2019, Yin.                  | NDVI          | 250 m           | IQR increase         | 0.1349   | OR            | 0.99                       | 0.95     | 1.04     | 0.72 | -0.010  | -0.051          | 0.040           | 0.021          |
| 2019, Laurent et al.        | NDVI          | 500 m           | IQR increase         | 0.119    | OR            | 0.96                       | 0.95     | 0.98     | 0.92 | -0.038  | -0.054          | -0.022          | 0.009          |
| 2019, Dzhambov et al. (UIT) | NDVI          | 300 m           | IQR increase         | 0.189    | OR            | 0.43                       | 0.23     | 0.81     | 0.72 | -0.844  | -1.470          | -0.211          | 0.320          |
| 2019, Dzhambov et al. (BBT) | NDVI          | 300 m           | IQR increase         | 0.148    | OR            | 0.75                       | 0.47     | 1.2      | 0.72 | -0.288  | -0.755          | 0.182           | 0.238          |
| 2019, Nieuwenhuijsen et al. | NDVI          | 300 m           | IQR increase         | 0.175    | OR            | 0.8                        | 0.7      | 0.9      | 0.8  | -0.223  | -0.357          | -0.105          | 0.068          |
| 2018, Agay Shay et al       | NDVI          | 300 m           | T3 vs T1             | 0.02698  | OR            | 0.91                       | 0.82     | 1.01     | 0.8  | -0.094  | -0.198          | 0.009           | 0.053          |

|                                        |                              |       |                                         |        |    |       |           |           |      |        |        |        |       |
|----------------------------------------|------------------------------|-------|-----------------------------------------|--------|----|-------|-----------|-----------|------|--------|--------|--------|-------|
| 2018,<br>Fong et al                    | NDVI                         | 250 m | 0.1 unit<br>increase of<br>mean<br>NDVI | 0.22   | OR | 0.98  | 0.97      | 0.99      | 0.8  | -0.020 | -0.030 | -0.010 | 0.005 |
| 2017,<br>Abelt, K.,<br>&<br>McLafferty | NDVI                         | 250 m | mean<br>NDVI                            | 0.1349 | OR | 1.075 | 0.63<br>3 | 1.82<br>6 | 0.72 | 0.072  | -0.458 | 0.602  | 0.270 |
| 2016,<br>Ebisu et<br>al.               | green<br>space<br>(land use) | 250 m | IQR<br>increase in<br>land use          | 0.38   | OR | 0.924 | 0.87<br>6 | 0.97<br>4 | 0.72 | -0.079 | -0.132 | -0.026 | 0.027 |
| 2015,<br>Grazulevic<br>iene et al.     | NDVI                         | 300 m | IQR<br>increase                         | 0.09   | OR | 0.94  | 0.69      | 1.29      | 0.69 | -0.062 | -0.371 | 0.255  | 0.158 |
| 2014,<br>Agay-<br>Shay et al.          | NDVI                         | 250 m | IQR<br>increase                         | 0.0578 | OR | 0.85  | 0.81      | 0.89      | 0.8  | -0.163 | -0.211 | -0.117 | 0.025 |

Table S10. Extracted data and effect size computations for meta-analysis on low birth weight; LCI- lower 95% confidence interval; UCI- upper 95% confidence interval; QI- quality index;  $\beta$ -standardized regression coefficient; SE- standard error.

| Study                       | $\beta$ for 10% increase in green space proxies | LCI( $\beta$ ) | UCI( $\beta$ ) | 10% OR | LCI(OR) | UCI(OR) |
|-----------------------------|-------------------------------------------------|----------------|----------------|--------|---------|---------|
| 2019, Yin                   | -0.002                                          | -0.010         | 0.006          | 0.998  | 0.990   | 1.006   |
| 2019, Laurent et al         | -0.008                                          | -0.011         | -0.004         | 0.992  | 0.989   | 0.996   |
| 2019, Dzhambov et al. (UIT) | -0.169                                          | -0.294         | -0.044         | 0.845  | 0.745   | 0.96    |
| 2019, Dzhambov et al.(BBT)  | -0.058                                          | -0.151         | 0.036          | 0.94   | 0.86    | 1.04    |
| 2019, Nieuwenhuijsen et al. | -<br>0.045                                      | -<br>0.071     | -<br>0.018     | 0.96   | 0.93    | 0.98    |
| 2018, Fong et al            | -<br>0.009                                      | -<br>0.013     | -<br>0.004     | 0.99   | 0.987   | 0.996   |
| 2016, Ebisu et al.          | -<br>0.016                                      | -<br>0.026     | -<br>0.005     | 0.98   | 0.974   | 0.995   |
| 2015, Grazuleviciene et al. | -<br>0.012                                      | -<br>0.074     | 0.050          | 0.988  | 0.928   | 1.051   |
| 2014, Agay-Shay et al.      | -<br>0.033                                      | -<br>0.042     | -<br>0.023     | 0.968  | 0.959   | 0.977   |

Table S11. Effect size computations for meta-analysis on low birth weight based on 10% increase in green space proxies(NDVI and green space percentage);  $\beta$ -standardized regression coefficient LCI- lower 95% confidence interval; UCI- upper 95% confidence interval; OR- odds ratio

| Study                       | OR   | LCI 95% | HCI 95% | weight (%) |
|-----------------------------|------|---------|---------|------------|
| 2019, Yin                   | 1.00 | 0.99    | 1.01    | 7.40       |
| 2019, Laurent et al         | 0.99 | 0.99    | 1.00    | 52.16      |
| 2019, Dzhambov et al. (UIT) | 0.84 | 0.75    | 0.96    | 0.82       |
| 2019, Dzhambov et al.(BBT)  | 0.94 | 0.86    | 1.04    | 0.84       |
| 2019, Nieuwenhuijsen et al. | 0.96 | 0.93    | 0.98    | 1.58       |

|                             |       |       |       |        |
|-----------------------------|-------|-------|-------|--------|
| 2018, Fong et al            | 0.99  | 0.99  | 1.00  | 25.34  |
| 2016, Ebisu Et al.          | 0.98  | 0.97  | 0.99  | 4.74   |
| 2015, Grazuleviciene Et al. | 0.99  | 0.93  | 1.05  | 0.87   |
| 2014, Agay-Shay Et al.      | 0.97  | 0.96  | 0.98  | 6.25   |
|                             |       |       |       |        |
| Pooled                      | 0.99  | 0.98  | 1.00  | 100.00 |
| Statistics                  |       |       |       |        |
| I-squared                   | 80.77 | 64.40 | 89.61 |        |
| Cochran's Q                 | 41.59 |       |       |        |
| Chi2, p                     | 0.00  |       |       |        |
| Q-Index                     | 7.57  |       |       |        |

Table S12. Meta-analysis result for the effect of 10% increase in green space proxies (NDVI and green space percentage) on low birth weight; OR- odds ratio; LCI- lower 95% confidence interval; UCI- upper 95% confidence interval

| <b>Study</b>                | <b><math>\beta</math> for 0.1 unit increase in NDVI</b> | <b>LCI(<math>\beta</math>)</b> | <b>UCI(<math>\beta</math>)</b> | <b>10% OR</b> | <b>LCI(OR)</b> | <b>UCI(OR)</b> |
|-----------------------------|---------------------------------------------------------|--------------------------------|--------------------------------|---------------|----------------|----------------|
| 2019, Yin                   | -0.007                                                  | -0.038                         | 0.023                          | 0.993         | 0.963          | 1.023          |
| 2019, Laurent et al         | -0.032                                                  | -0.046                         | -0.018                         | 0.969         | 0.955          | 0.983          |
| 2019, Dzhambov et al. (UIT) | -0.447                                                  | -0.778                         | -0.116                         | 0.640         | 0.460          | 0.891          |
| 2019, Dzhambov et al.(BBT)  | -0.194                                                  | -0.509                         | 0.121                          | 0.824         | 0.601          | 1.129          |
| 2019, Nieuwenhuijsen et al. | -<br>0.128                                              | -<br>0.204                     | -<br>0.051                     | 0.88          | 0.82           | 0.95           |
| 2018, Fong et al            | -<br>0.02                                               | -<br>0.013                     | -<br>0.004                     | 0.98          | 0.986          | 0.996          |
| 2015, Grazuleviciene et al. | -<br>0.069                                              | -<br>0.41                      | -<br>0.27                      | 0.93          | 0.66           | 1              |
| 2014, Agay-Shay et al.      | -<br>0.281                                              | -<br>0.365                     | -<br>0.198                     | 0.755         | 0.69           | 0.821          |

Table S13. Effect size computations for meta-analysis on low birth weight based on 0.1 unit increase in NDVI; $\beta$ -standardized regression coefficient; LCI- lower 95% confidence interval; UCI- upper 95% confidence interval; OR- odds ratio

| <b>Study</b>                | <b>OR</b> | <b>LCI 95%</b> | <b>HCI 95%</b> | <b>weight (%)</b> |
|-----------------------------|-----------|----------------|----------------|-------------------|
| 2019, Yin                   | 0.99      | 0.96           | 1.02           | 2.91              |
| 2019, Laurent et al         | 0.97      | 0.96           | 0.98           | 10.89             |
| 2019, Dzhambov et al. (UIT) | 0.64      | 0.46           | 0.89           | 1.42              |
| 2019, Dzhambov et al.(BBT)  | 0.82      | 0.60           | 1.13           | 1.42              |
| 2019, Nieuwenhuijsen et al. | 0.88      | 0.82           | 0.95           | 1.83              |
| 2018, Fong et al            | 0.98      | 0.99           | 1.00           | 78.37             |
| 2015, Grazuleviciene Et al. | 0.93      | 0.66           | 1.00           | 1.38              |
| 2014, Agay-Shay Et al.      | 0.75      | 0.69           | 0.82           | 1.79              |
|                             |           |                |                |                   |
| Pooled                      | 0.96      | 0.92           | 1.01           | 100               |
| Statistics                  |           |                |                |                   |
| I-squared                   | 87.36     | 77.30          | 92.97          |                   |
| Cochran's Q                 | 55.40     |                |                |                   |
| Chi <sup>2</sup> , p        | 0.00      |                |                |                   |
| Q-Index                     | 12.03     |                |                |                   |

Table S14. Meta-analysis result for the effect of 0.1 unit increase in NDVI on low birth weight; OR- odds ratio; LCI- lower 95% confidence interval; UCI- upper 95% confidence interval

| Year, Author              | Exposure Type | Buffer | Exposure description                      | IQR unit | Estimate type | Effect estimate calculated | LCI (OR) | UCI (OR) | QI   | $\beta$ | LCI ( $\beta$ ) | UCI ( $\beta$ ) | SE( $\beta$ ) |
|---------------------------|---------------|--------|-------------------------------------------|----------|---------------|----------------------------|----------|----------|------|---------|-----------------|-----------------|---------------|
| 2019, Dzhambov et al. UIT | NDVI          | 300 m  | IQR increase                              | 0.189    | OR            | 0.41                       | 0.21     | 0.81     | 0.72 | -0.892  | -1.561          | -0.211          | 0.341         |
| 2019, Dzhambov et al. BBT | NDVI          | 300 m  | IQR increase                              | 0.148    | OR            | 0.78                       | 0.5      | 1.2      | 0.72 | -0.248  | -0.693          | 0.182           | 0.227         |
| 2019, Donovan et al.      | NDVI          | 240 m  | IQR increase                              | 0.090    | OR            | 0.94                       | 0.9      | 1        | 0.72 | -0.062  | -0.105          | 0               | 0.022         |
| 2019, Eriksson et al.     | NDVI          | 500 m  | IQR increase                              | 0.167    | OR            | 0.31                       | 0.1      | 1        | 0.72 | -1.171  | -2.303          | 0               | 0.577         |
| 2018, Agay Shay et al.    | NDVI          | 300 m  | T3 vs T1                                  | 0.02698  | OR            | 0.95                       | 0.87     | 1.03     | 0.99 | -0.051  | -0.139          | 0.030           | 0.045         |
| 2018, Fog C. et al.       | NDVI          | 250 m  | 0.1 unit increase of mean NDVI, Q4 vs. Q1 | 0.22     | OR            | 0.98                       | 0.97     | 0.99     | 0.8  | -0.020  | -0.030          | -0.010          | 0.005         |
| 2018, Glazer et al.       | NDVI          | 250 m  | IQR increase, SD:0.15                     | 0.20235  | OR            | 0.99                       | 0.9      | 1.1      | 0.8  | -0.010  | -0.105          | 0.095           | 0.049         |
| 2017, Abelt et al.        | NDVI          | 250 m  | mean NDVI, street tree count              | 0.1349   | OR            | 1.17                       | 0.885    | 1.538    | 0.72 | 0.154   | -0.122          | 0.430           | 0.141         |



|                                       |                              |                                                          |                  |                                             |    |       |           |           |      |            |        |         |        |
|---------------------------------------|------------------------------|----------------------------------------------------------|------------------|---------------------------------------------|----|-------|-----------|-----------|------|------------|--------|---------|--------|
| 2015,<br>Grazule<br>viciene<br>et al. | NDVI                         | 300 m                                                    | IQR<br>increase  | 0.09                                        | OR | 0.93  | 0.81      | 1.08      | 0.69 | -<br>0.073 | -0.211 | 0.077   | 0.070  |
| 2016,<br>Cusack<br>et al.             | NDVI                         | 250 m                                                    | Quantiles        | IQR<br>=0.1<br>5                            | OR | 0.99  | 0.97      | 1         | 1    | -<br>0.010 | -0.030 | 0       | 0.010  |
| 2016,<br>Ebisu et<br>al.              | green<br>space<br>(land use) | 250 m                                                    | IQR<br>increase  | NA                                          | OR | 0.974 | 0.94<br>9 | 0.99      | 0.72 | -<br>0.026 | -0.052 | -0.010  | 0.0133 |
| 2016,<br>Casey et<br>al.              | NDVI                         | 250 m                                                    | NDVI<br>tertiles | Tertile<br>cut<br>off<br>point<br>:<br>0.43 | OR | 0.73  | 0.58      | 0.97      | 0.83 | -<br>0.315 | -0.545 | -0.030  | 0.117  |
| 2014,<br>Hystad<br>et al.             | NDVI                         | 100 m<br>and<br>250m<br>were<br>highly<br>correla<br>ted | IQR<br>increase  | 0.1                                         | OR | 0.97  | 0.94      | 1         | 0.92 | -<br>0.030 | -0.062 | 0       | 0.016  |
| 2011,<br>Dadvan<br>d et al.           | NDVI                         | 100 m                                                    | 10%<br>increase  | 0.00<br>8                                   | OR | 0.99  | 0.98<br>1 | 0.99<br>9 | 0.72 | -<br>0.010 | -0.019 | -0.0007 | 0.0047 |
| 2010,<br>Donova<br>n et al.           | Tree<br>cover                | 50m,<br>100m,<br>200m                                    | 10%<br>increase  | NA                                          | OR | 0.847 | 0.76<br>1 | 0.94<br>2 | 0.72 | -<br>0.167 | -0.273 | -0.060  | 0.054  |

Table S15. Extracted data and effect size computations for meta-analysis on small for gestational age; LCI- lower 95% confidence interval; UCI- upper 95% confidence interval; OR- odds ratio; QI- quality index;  $\beta$ -standardized regression coefficient; SE- standard error.

| <b>Year, Author</b>         | <b>10% Increase in residential greenness (<math>\beta</math>)</b> | <b>LCI(<math>\beta</math>)</b> | <b>UCI(<math>\beta</math>)</b> | <b>10% OR</b> | <b>LCI (OR)</b> | <b>UCI(OR)</b> |
|-----------------------------|-------------------------------------------------------------------|--------------------------------|--------------------------------|---------------|-----------------|----------------|
| 2019, Dzhambov et al. (UIT) | -0.393                                                            | -0.688                         | -0.390                         | 0.675         | 0.503           | 0.677          |
| 2019, Dzhambov et al. (BBT) | -0.109                                                            | -0.305                         | -0.107                         | 0.896         | 0.737           | 0.898          |
| 2019, Donovan et al.        | -0.027                                                            | -0.046                         | -0.027                         | 0.973         | 0.955           | 0.973          |
| 2019, Eriksson et al.       | -0.516                                                            | -1.014                         | -0.511                         | 0.597         | 0.363           | 0.600          |
| 2018, Fong C. et al         | -0.009                                                            | -0.013                         | -0.009                         | 0.991         | 0.987           | 0.991          |
| 2018, Glazer et al.         | -0.002                                                            | -0.021                         | 0.017                          | 0.998         | 0.980           | 1.017          |
| 2015, Grazuleviciene        | -0.015                                                            | -0.042                         | 0.013                          | 0.986         | 0.959           | 1.013          |
| 2016, Ebisu et al           | -0.005                                                            | -0.010                         | -0.00007                       | 0.995         | 0.990           | 1.000          |
| 2014, Hystad et al.         | -0.006                                                            | -0.012                         | 0.0002                         | 0.994         | 0.988           | 1.000          |
| 2011, Dadvand et al.        | -0.010                                                            | -0.019                         | -0.0007                        | 0.990         | 0.981           | 0.999          |
| 2010, Donovan et al.        | -0.167                                                            | -0.273                         | -0.060                         | 0.847         | 0.761           | 0.942          |

Table S16. Effect size computations for meta-analysis on small for gestational age based on 10% increase in green space proxies (NDVI and green space percentage)  $\beta$ -standardized regression coefficient; LCI- lower 95% confidence interval; UCI- upper 95% confidence interval; OR- odds ratio

| <b>Study</b>                | <b>OR</b> | <b>LCI</b> | <b>UCI</b> | <b>weight (%)</b> |
|-----------------------------|-----------|------------|------------|-------------------|
| 2019, Dzhambov et al. (UIT) | 0.68      | 0.50       | 0.68       | 1.21              |
| 2019, Dzhambov et al. (BBT) | 0.90      | 0.74       | 0.90       | 1.23              |
| 2019, Donovan et al.        | 0.97      | 0.95       | 0.97       | 4.18              |
| 2019, Eriksson et al.       | 0.60      | 0.36       | 0.60       | 1.21              |
| 2018, Fong C. et al         | 0.99      | 0.99       | 0.99       | 60.73             |

|                             |       |       |       |        |
|-----------------------------|-------|-------|-------|--------|
| 2018, Glazer et al          | 1.00  | 0.98  | 1.02  | 2.19   |
| 2015, Grazuleviciene et al. | 0.99  | 0.96  | 1.01  | 1.50   |
| 2016, Ebisu et al.          | 0.99  | 0.99  | 1.00  | 11.49  |
| 2014, Hystad et al.         | 0.99  | 0.99  | 1.00  | 10.54  |
| 2011, Dadvand et al.        | 0.99  | 0.98  | 1.00  | 4.50   |
| 2010, Donovan et al.        | 0.85  | 0.76  | 0.94  | 1.23   |
|                             |       |       |       |        |
| Pooled                      | 0.98  | 0.96  | 0.99  | 100.00 |
| Statistics                  |       |       |       |        |
| I-squared                   | 85.85 | 76.46 | 91.49 |        |
| Cochran's Q                 | 70.68 |       |       |        |
| Chi2, p                     | 0.00  |       |       |        |
| Q-Index                     | 13.77 |       |       |        |

Table S17. Meta-analysis results for the effect of 10% increase in green space proxies (NDVI and green space percentage) on small for gestational age; OR- odds ratio; LCI- lower 95% confidence interval; UCI- upper 95% confidence interval

| Year, Author                | 0.1 unit increase in NDVI ( $\beta$ ) | LCI ( $\beta$ ) | UCI ( $\beta$ ) | 0.1 OR | LCI (OR) | UCI (OR) |
|-----------------------------|---------------------------------------|-----------------|-----------------|--------|----------|----------|
| 2019, Dzhambov et al. (UIT) | -0.892                                | -1.561          | -0.211          | 0.410  | 0.210    | 0.810    |
| 2019, Dzhambov et al. (BBT) | -0.248                                | -0.693          | 0.182           | 0.780  | 0.500    | 1.200    |
| 2019, Donovan et al.        | -0.062                                | -0.105          | 0.000           | 0.940  | 0.900    | 1.000    |
| 2019, Eriksson et al.       | -1.171                                | -2.303          | 0.000           | 0.310  | 0.100    | 1.000    |
| 2018, Fong C. et al         | -0.020                                | -0.030          | -0.010          | 0.98   | 0.97     | 0.99     |
| 2018, Glazer et al          | -0.005                                | -0.052          | 0.042           | 0.995  | 0.949    | 1.043    |
| 2015, Grazuleviciene et al. | -0.081                                | -0.234          | 0.073           | 0.923  | 0.791    | 1.076    |
| 2014, Hystad et al.         | -0.030                                | -0.062          | 0               | 0.97   | 0.94     | 1        |

|                         |        |        |        |       |       |       |
|-------------------------|--------|--------|--------|-------|-------|-------|
| 2011,<br>Dadvand et al. | -0.123 | -0.239 | -0.008 | 0.884 | 0.788 | 0.992 |
|-------------------------|--------|--------|--------|-------|-------|-------|

Table S18. Effect size computations for meta-analysis on small for gestational age based on 0.1 unit increase in NDVI;  $\beta$ -standardized regression coefficient; LCI- lower 95% confidence interval; UCI- upper 95% confidence interval; OR- odds ratio

| <b>Study</b>                   | <b>OR</b> | <b>LCI</b> | <b>UCI</b> | <b>weight (%)</b> |
|--------------------------------|-----------|------------|------------|-------------------|
| 2019,<br>Dzhambov et al. (UIT) | 0.41      | 0.21       | 0.81       | 1.31              |
| 2019,<br>Dzhambov et al. (BBT) | 0.78      | 0.50       | 1.20       | 1.33              |
| 2019,<br>Donovan et al.        | 0.94      | 0.90       | 1.00       | 3.73              |
| 2019, Eriksson et al.          | 0.31      | 0.10       | 1.00       | 1.30              |
| 2018, Fong C. et al            | 0.98      | 0.97       | 0.99       | 73.52             |
| 2018, Glazer et al             | 1.00      | 0.95       | 1.04       | 4.82              |
| 2015,<br>Grazuleviciene        | 0.92      | 0.79       | 1.08       | 1.52              |
| 2014, Hystad                   | 0.97      | 0.94       | 1.00       | 10.67             |
| 2011,<br>Dadvand               | 0.88      | 0.79       | 0.99       | 1.80              |
|                                |           |            |            |                   |
| Pooled                         | 0.95      | 0.91       | 0.99       | 100.00            |
| Statistics                     |           |            |            |                   |
| I-squared                      | 55.06     | 4.98       | 78.74      |                   |
| Cochran's Q                    | 17.80     |            |            |                   |
| Chi2, p                        | 0.02      |            |            |                   |
| Q-Index                        | 12.24     |            |            |                   |

Table S19. Meta-analysis result for the effect of 0.1 unit increase in NDVI on small for gestational age; OR- odds ratio; LCI- lower 95% confidence interval; UCI- upper 95% confidence interval

| Year, Author                | Exposure Type | Buffer | Exposure description  | IQR unit | estimate type | effect estimate calculated | LCI (OR) | UCI (OR) | QI    | $\beta$ | LCI( $\beta$ ) | UCI( $\beta$ ) | SE( $\beta$ ) |
|-----------------------------|---------------|--------|-----------------------|----------|---------------|----------------------------|----------|----------|-------|---------|----------------|----------------|---------------|
| 2019, Dzhambov et al. UIT   | NDVI          | 300    | IQR increase          | 0.189    | OR            | 0.78                       | 0.53     | 1.13     | 0.720 | -0.248  | -0.635         | 0.122          | 0.197         |
| 2019, Dzhambov et al. BBT   | NDVI          | 300    | IQR increase          | 0.148    | OR            | 1.31                       | 0.91     | 1.88     | 0.720 | 0.270   | -0.094         | 0.631          | 0.186         |
| 2018, Agay Shay et al.      | NDVI          | 300 m  | T3 vs T1              | 0.02698  | OR            | 0.95                       | 0.87     | 1.03     | 0.99  | -0.051  | -0.139         | 0.030          | 0.045         |
| 2018, Glazer et al et al.   | NDVI          | 250 m  | IQR increase, SD:0.15 | 0.20235  | OR            | 0.99                       | 0.9      | 1.09     | 0.8   | -0.010  | -0.105         | 0.086          | 0.049         |
| 2017, Abelt et al.          | NDVI          | 250 m  | mean NDVI             | 0.1349   | OR            | 0.841                      | 0.638    | 1.108    | 0.72  | -0.174  | -0.450         | 0.102          | 0.141         |
| 2015, Grazuleviciene et al. | NDVI          | 300 m  | Per IQR increase      | 0.09     | OR            | 1.06                       | 0.89     | 1.25     | 0.69  | 0.058   | -0.117         | 0.223          | 0.089         |
| 2014, Agay-Shay et al.      | NDVI          | 250 m  | IQR increase          | 0.0578   | OR            | 1.01                       | 0.97     | 1.05     | 0.8   | 0.010   | -0.030         | 0.049          | 0.021         |
| 2016, Cusack et al.         | NDVI          | 250m   | Quantiles             | IQR=0.15 | OR            | 1.01                       | 0.99     | 1.02     | 1     | 0.010   | -0.010         | 0.020          | 0.010         |

|                            |      |                                                                 |                 |                                         |    |       |           |      |      |        |        |        |       |
|----------------------------|------|-----------------------------------------------------------------|-----------------|-----------------------------------------|----|-------|-----------|------|------|--------|--------|--------|-------|
| 2016,<br>Casey et<br>al.   | NDVI | 250 m                                                           | tertiles        | tertile<br>cut<br>off<br>point:<br>0.43 | OR | 0.78  | 0.61      | 0.99 | 0.83 | -0.249 | -0.494 | -0.010 | 0.125 |
| 2014,<br>Hystad et<br>al.  | NDVI | <b>100 m</b><br>and<br>250m<br>were<br>highly<br>correl<br>ated | IQR<br>increase | 0.1                                     | OR | 0.95  | 0.91      | 0.99 | 0.92 | -0.051 | -0.094 | -0.010 | 0.022 |
| 2013,<br>Laurent<br>et al. | NDVI | 150 m                                                           | IQR<br>increase | 0.131                                   | OR | 0.984 | 0.96<br>7 | 1    | 0.8  | -0.016 | -0.034 | 0      | 0.009 |

Table S20. Extracted data and effect size computations for meta-analysis on preterm birth LCI- lower 95% confidence interval; UCI- upper 95% confidence interval; OR- odds ratio; QI- quality index;  $\beta$ -standardized regression coefficient; SE- standard error.

| <b>Year, Author</b>         | <b>10% increase in residential greenness (β)</b> | <b>LCI(β)</b> | <b>UCI(β)</b> | <b>10% OR</b> | <b>LCI(OR)</b> | <b>UCI(OR)</b> |
|-----------------------------|--------------------------------------------------|---------------|---------------|---------------|----------------|----------------|
| 2019, Dzhambov et al. UIT   | -0.050                                           | -0.127        | 0.028         | 0.952         | 0.881          | 1.028          |
| 2019, Dzhambov et al. BBT   | 0.054                                            | -0.019        | 0.127         | 1.055         | 0.981          | 1.135          |
| 2018, Glazer et al.         | -0.002                                           | -0.021        | 0.017         | 0.998         | 0.979          | 1.017          |
| 2015, Grazuleviciene et al. | 0.012                                            | -0.023        | 0.047         | 1.012         | 0.977          | 1.048          |
| 2014, Agay-Shay et al.      | 0.002                                            | -0.006        | 0.010         | 1.002         | 0.994          | 1.010          |
| 2014, Hystad et al.         | -0.010                                           | -0.019        | -0.002        | 0.990         | 0.981          | 0.998          |
| 2013, Laurent et al.        | -0.003                                           | -0.007        | 0.00026       | 0.997         | 0.993          | 1.000          |

Table S21. Effect size computations for meta-analysis on preterm birth based on 10% increase in green space proxies (NDVI and green space percentage)  $\beta$ -standardized regression coefficient; LCI- lower 95% confidence interval; UCI- upper 95% confidence interval; OR- odds ratio.

| <b>Study</b>              | <b>OR</b> | <b>LCI</b> | <b>UCI</b> | <b>weight (%)</b> |
|---------------------------|-----------|------------|------------|-------------------|
| 2019, Dzhambov et al. UIT | 0.95      | 0.88       | 1.03       | 1.65              |
| 2019, Dzhambov et al. BBT | 1.06      | 0.98       | 1.14       | 1.66              |
| 2018, Glazer et al        | 1.00      | 0.98       | 1.02       | 3.79              |
| 2015, Grazuleviciene      | 1.01      | 0.98       | 1.05       | 2.00              |
| 2014, Agay-Shay           | 1.00      | 0.99       | 1.01       | 13.28             |
| 2014, Hystad              | 0.99      | 0.98       | 1.00       | 13.70             |
| 2013, Laurent             | 1.00      | 0.99       | 1.00       | 63.92             |
|                           |           |            |            |                   |
| Pooled                    | 1.00      | 0.99       | 1.00       | 100.00            |
| Statistics                |           |            |            |                   |
| I-squared                 | 30.53     | 0.00       | 70.32      |                   |
| Cochran's Q               | 8.64      |            |            |                   |
| Chi2, p                   | 0.20      |            |            |                   |

|         |       |  |  |  |
|---------|-------|--|--|--|
| Q-Index | 11.62 |  |  |  |
|---------|-------|--|--|--|

Table S22. Meta-analysis result for the effect of 10% increase in residential greenness (NDVI and green space percentage) on preterm birth; OR- odds ratio; LCI- lower 95% confidence interval; UCI- upper 95% confidence interval.

| Year, Author                | 0.1 unit increase in NDVI ( $\beta$ ) | LCI( $\beta$ ) | UCI( $\beta$ ) | 0.1 OR | LCI(OR) | UCI(OR) |
|-----------------------------|---------------------------------------|----------------|----------------|--------|---------|---------|
| 2019, Dzhambov et al. UIT   | -0.132                                | -0.336         | 0.073          | 0.877  | 0.715   | 1.076   |
| 2019, Dzhambov et al. BBT   | 0.182                                 | -0.064         | 0.427          | 1.200  | 0.938   | 1.533   |
| 2018, Glazer et al.         | -0.005                                | -0.052         | 0.042          | 0.995  | 0.949   | 1.043   |
| 2015, Grazuleviciene et al. | 0.065                                 | -0.129         | 0.259          | 1.067  | 0.879   | 1.296   |
| 2014, Agay-Shay et al.      | 0.017                                 | -0.053         | 0.087          | 1.017  | 0.949   | 1.091   |
| 2014, Hystad et al.         | -0.051                                | -0.094         | -0.010         | 0.95   | 0.91    | 0.99    |
| 2013, Laurent et al.        | -0.012                                | -0.026         | 0.001          | 0.988  | 0.975   | 1.001   |

Table S23. Effect size computations for meta-analysis on preterm birth based on 0.1 unit increase in NDVI; OR- odds ratio; LCI- lower 95% confidence interval; UCI- upper 95% confidence interval.

| Study                | OR    | LCI 95% | HCI 95% | weight (%) |
|----------------------|-------|---------|---------|------------|
| 2018, Glazer et al   | 0.995 | 0.950   | 1.043   | 8.083      |
| 2015, Grazuleviciene | 1.067 | 0.879   | 1.296   | 2.357      |
| 2014, Agay-Shay      | 1.017 | 0.949   | 1.091   | 4.979      |
| 2014, Hystad         | 0.95  | 0.91    | 0.99    | 10.929     |
| 2013, Laurent        | 0.988 | 0.975   | 1.001   | 73.652     |
| Pooled               | 0.987 | 0.970   | 1.005   | 100        |



|             |        |   |        |  |
|-------------|--------|---|--------|--|
| Statistics  |        |   |        |  |
| I-squared   | 13.226 | 0 | 81.954 |  |
| Cochran's Q | 4.610  |   |        |  |
| Chi2, p     | 0.30   |   |        |  |
| Q-Index     | 12.024 |   |        |  |

Table S24. Meta-analysis results of the effect of 0.1 unit increase in NDVI on preterm birth; OR- odds ratio; LCI- lower 95% confidence interval; UCI- upper 95% confidence interval.

| Study                        | ES       | LCI 95%  | HCI 95%  | weight (%) |
|------------------------------|----------|----------|----------|------------|
| 2018, Agay Shay et al.       | 0.0011   | 0.0006   | 0.0016   | 11.66      |
| 2018, Cusack et al           | 0.0028   | -0.0026  | 0.0082   | 1.32       |
| 2018, Fog C. et al           | 0.0005   | 0.0003   | 0.0007   | 52.36      |
| 2018, Glazer et al.          | 0.0021   | -0.0001  | 0.0042   | 1.69       |
| 2017, Cusack et al. Portland | -0.0008  | -0.0020  | 0.0004   | 2.67       |
| 2017, Cusack et al. Austin   | 0.0004   | -0.0010  | 0.0017   | 2.37       |
| 2017, Abelt                  | 0.0019   | 0.0000   | 0.0038   | 1.63       |
| 2016, Cusack                 | 0.0004   | 0.0000   | 0.0008   | 17.53      |
| 2016, Casey                  | 0.0043   | -0.0001  | 0.0088   | 1.40       |
| 2014, Hystad                 | 0.0035   | 0.0028   | 0.0042   | 6.23       |
| 2012, Dadvand                | 0.0085   | 0.0004   | 0.0166   | 1.15       |
|                              |          |          |          |            |
| Pooled                       | 0.0009   | -0.0002  | 0.0020   | 100        |
| Statistics                   |          |          |          |            |
| I-squared                    | 88.36246 | 81.15955 | 92.81162 |            |
| Cochran's Q                  | 85.92882 |          |          |            |
| Chi2, p                      | 0.0000   |          |          |            |
| Q-Index                      | 14.29291 |          |          |            |

Table S25. Meta-Analysis Results for the effect of NDVI increase on term birth weight (standardized regression coefficients, quality effects model) ;  $\beta$ -standardized regression coefficient; LCI- lower 95% confidence interval; UCI- upper 95% confidence interval.

| <b>Study</b>                | <b>ES</b> | <b>LCI<br/>95%</b> | <b>HCI<br/>95%</b> | <b>weight<br/>(%)</b> |
|-----------------------------|-----------|--------------------|--------------------|-----------------------|
| 2019, Nieuwenhuijsen et al. | 0.0056    | 0.0041             | 0.0071             | 4.45                  |
| 2018, Agay Shay et al.      | 0.0011    | 0.0006             | 0.0016             | 36.64                 |
| 2015, Grazuleviciene        | 0.0014    | -0.0009            | 0.0037             | 2.56                  |
| 2014, Agay-Shay             | 0.0018    | 0.0012             | 0.0023             | 24.75                 |
| 2014, Dadvand (in)B         | 0.0037    | 0.0004             | 0.0070             | 2.28                  |
| 2013, Markevych             | 0.0039    | 0.0002             | 0.0076             | 2.15                  |
| 2013, Laurent               | 0.0001    | -0.0004            | 0.0007             | 24.75                 |
| 2011, Dadvand               | -0.0011   | -0.0037            | 0.0015             | 2.41                  |
|                             |           |                    |                    |                       |
| Pooled                      | 0.0013    | 0.0000             | 0.0026             | 100.00                |
| Statistics                  |           |                    |                    |                       |
| I-squared                   | 88.4163   | 79.4791            | 93.4612            |                       |
| Cochran's Q                 | 60.42997  |                    |                    |                       |
| Chi2, p                     | 0.0000    |                    |                    |                       |
| Q-Index                     | 13.02925  |                    |                    |                       |

Table S26. Meta-Analysis Results for the effect of NDVI increase on birth weight that are adjusted for gestational age (standardized regression coefficients, quality effects model) ;  $\beta$ -standardized regression coefficient; LCI- lower 95% confidence interval; UCI- upper 95% confidence interval.

| <b>Study</b>                      | <b>ES</b> | <b>LCI<br/>95%</b> | <b>HCI<br/>95%</b> | <b>weight<br/>(%)</b> |
|-----------------------------------|-----------|--------------------|--------------------|-----------------------|
| 2019,<br>Nieuwenhuijsen et<br>al. | 0.8       | 0.7                | 0.9                | 0.63                  |
| 2018, Fong et al                  | 0.98      | 0.97               | 0.99               | 94.88                 |
| 2017, Abelt, K., &<br>McLafferty  | 1.08      | 0.63               | 1.83               | 0.03                  |
| 2014, Agay-Shay Et<br>al.         | 0.85      | 0.81               | 0.89               | 4.46                  |
|                                   |           |                    |                    |                       |
| Pooled                            | 0.97      | 0.80               | 1.18               | 100                   |
| Statistics                        |           |                    |                    |                       |
| I-squared                         | 93.02     | 85.35              | 96.68              |                       |
| Cochran's Q                       | 42.99     |                    |                    |                       |
| Chi2, p                           | 0.00      |                    |                    |                       |
| Q-Index                           | 0.00      |                    |                    |                       |

Table S27. Meta-Analysis Results for the effect of NDVI increase on term low birth weight (standardized regression coefficients, quality effects model) ;  $\beta$ -standardized regression coefficient; LCI- lower 95% confidence interval; UCI- upper 95% confidence interval.

| <b>Study</b>          | <b>ES</b> | <b>LCI<br/>95%</b> | <b>HCI<br/>95%</b> | <b>weight<br/>(%)</b> |
|-----------------------|-----------|--------------------|--------------------|-----------------------|
| 2018, Agay Shay et al | 0.91      | 0.82               | 1.01               | 23.12                 |

|                             |       |      |       |        |
|-----------------------------|-------|------|-------|--------|
| 2015, Grazuleviciene Et al. | 0.94  | 0.69 | 1.29  | 5.80   |
| 2014, Agay-Shay Et al.      | 0.85  | 0.81 | 0.89  | 71.09  |
| Pooled                      | 0.87  | 0.83 | 0.91  | 100.00 |
| Statistics                  |       |      |       |        |
| I-squared                   | 0.00  | 0.00 | 87.56 |        |
| Cochran's Q                 | 1.67  |      |       |        |
| Chi2, p                     | 0.43  |      |       |        |
| Q-Index                     | 16.20 |      |       |        |

Table S28. Meta-Analysis Results for the effect of NDVI increase on low birth weight that are adjusted for gestational age (standardized regression coefficients, quality effects model) ;  $\beta$ -standardized regression coefficient; LCI- lower 95% confidence interval; UCI- upper 95% confidence interval.

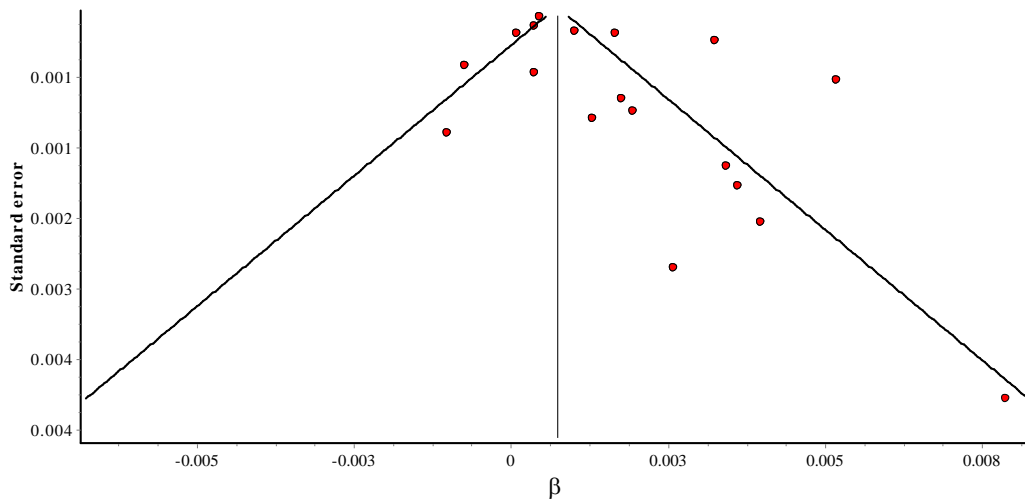

Figure S3. Funnel plot on the studies evaluating the effect of residential greenness (NDVI) on birthweight (standardized regression coefficients, quality effects model).

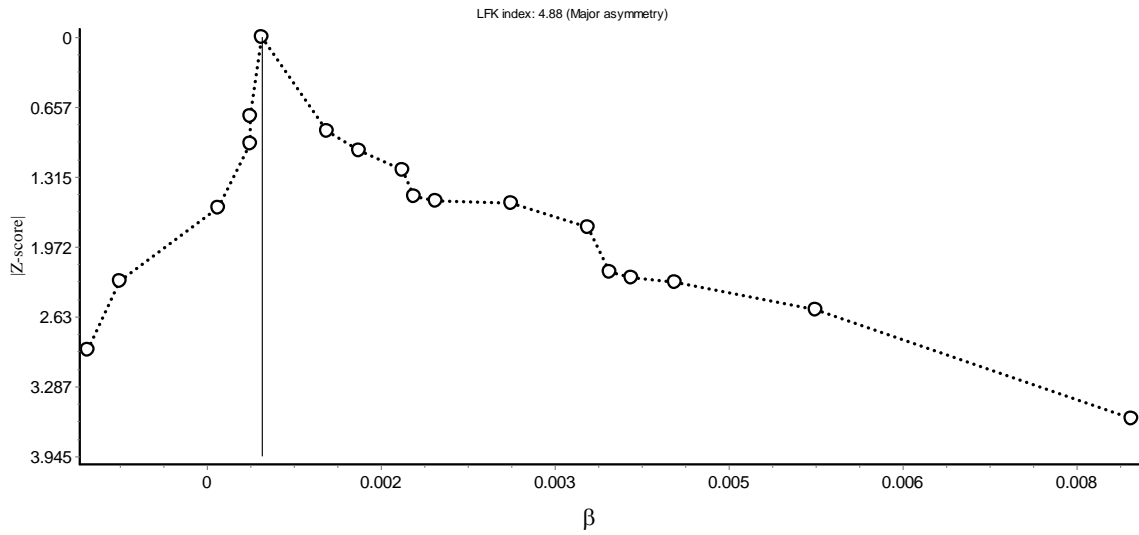

Figure S4. Doi plot on the studies evaluating the effect of residential greenness (NDVI) on birthweight (standardized regression coefficients, quality effects model).

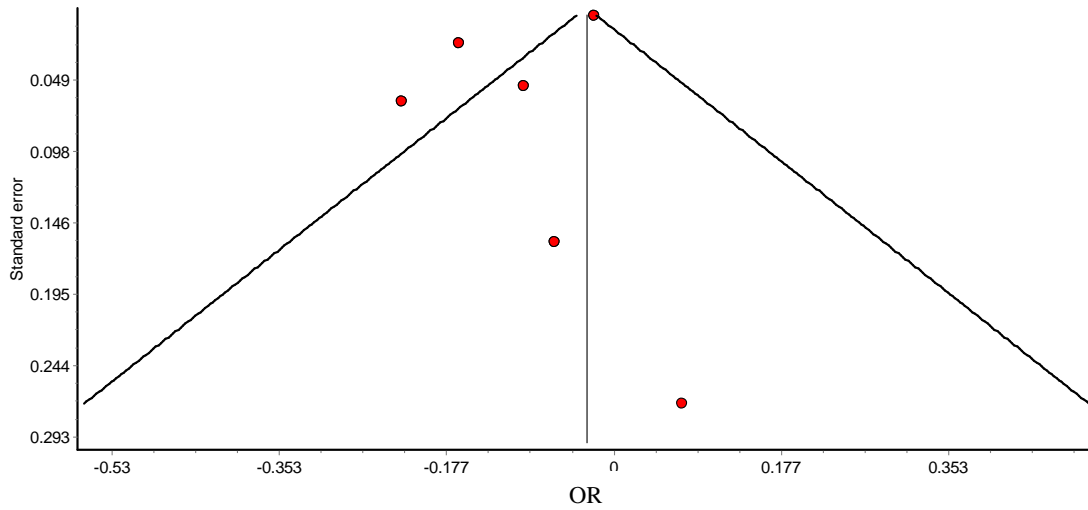

Figure S5. Funnel plot on the effect of residential greenness (NDVI) on low birth weight (odds ratio, quality effects model).

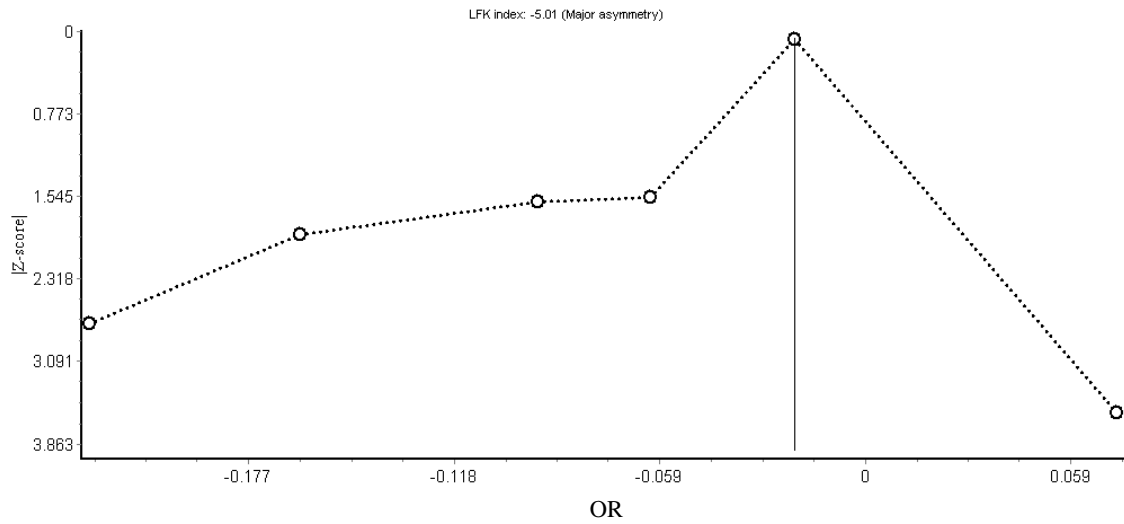

Figure S6. Doi plot on the studies evaluating the effect of residential greenness (NDVI) on low birth weight (odds ratio, quality effects model).

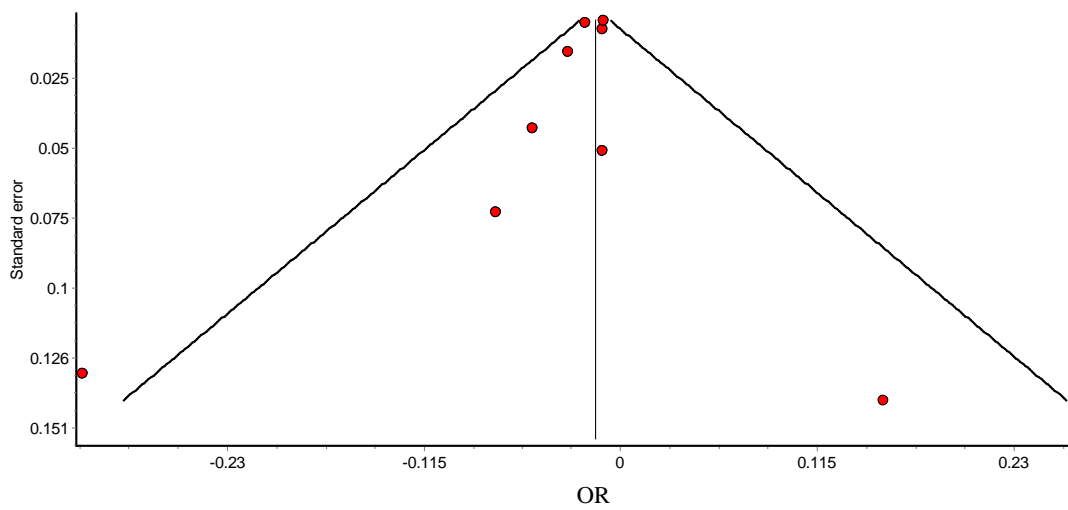

Figure S7. Funnel plot on the effect of residential greenness (NDVI) on small for gestational age (odds ratio, quality effects model).

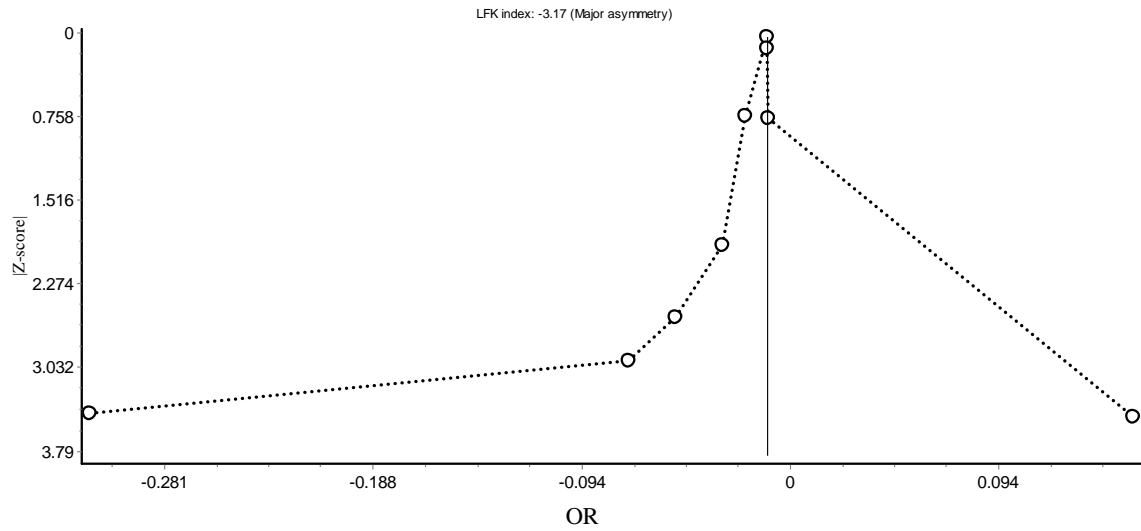

Figure S8. Doi plot on the effect of residential greenness (NDVI) on small for gestational age (odds ratio, quality effects model).

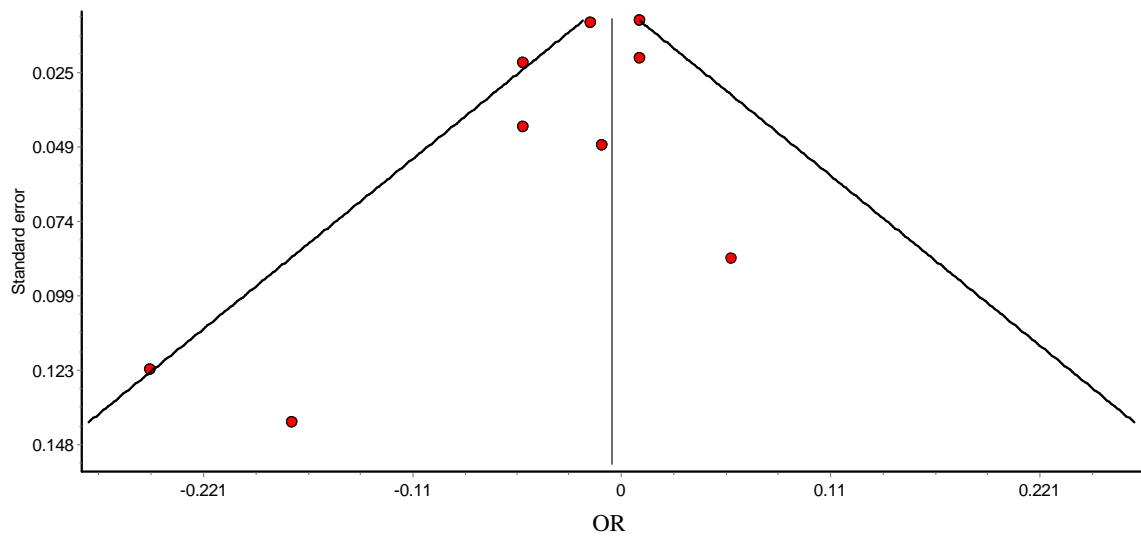

Figure S9. Funnel plot on the effect of residential greenness (NDVI) on preterm birth (odds ratio, quality effects model).

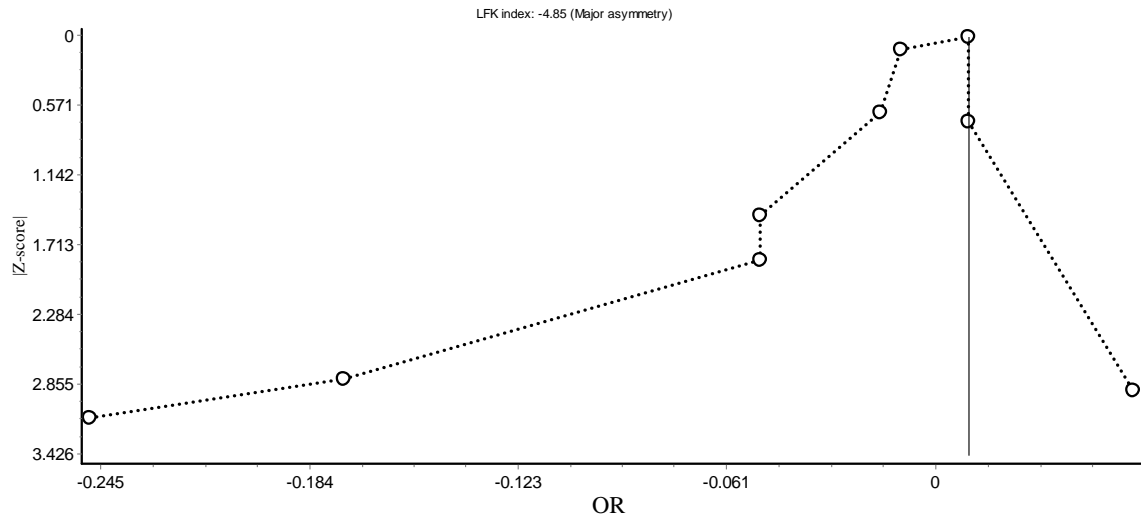

Figure S10. Doi plot on the effect of residential greenness (NDVI) on preterm birth (odds ratio, quality effects model).
